# Supplementary material
Source: MDPI journal article supplement (https://www.mdpi.com/2073-4425/13/5/913)
Supplement: s1 [file s1]

Archive with 2 entries (2 files):
- genes-1669671-supplementary.pdf
- Table S1_metadata.xlsx
