# Supplementary material for: RADseq Data Suggest Occasional Hybridization between Microcebus murinus and M. ravelobensis in Northwestern Madagascar
Source: MDPI journal article supplement (doi:10.3390/genes13050913), 2022-05-19
Supplement: s1 [file s1 › Table S1_metadata.xlsx]

## Sheet: Sheet1
Species	Sample ID	Site	Latitude (°N)	Longitude (°E)	Sex	Dataset	# raw reads	# trimmed reads	# mapped autosomal reads (filtered)	# recoverd RAD loci	Mean autosomal depth at RAD loci	# mapped mitochondrial reads (filtered)	Mitochondrial depth at RAD site	Mitochondrial haplotype	Individuals with nuclear admixture	Demographic modelling	bioproject_accession	Plate	Note
Microcebus murinus	Mmur_m57y17_jabe	Ambanjabe	-16.3269	46.7137	male	paired-end	3324818	2883168	1749162	68628	6.38831	0	0	depth too low			PRJNA807164	5
Microcebus murinus	Mmur_m59y17_jabe	Ambanjabe	-16.3261	46.7148	male	paired-end	3441950	3039196	1925558	68970	6.98346	2	0	depth too low			PRJNA807164	5
Microcebus murinus	Mmur_f17y18_mari	Mariarano	-15.531	46.727	female	paired-end	3567948	2880516	2206961	76822	7.20446	23	0	depth too low			PRJNA807164	11
Microcebus murinus	Mmur_f200y17_jabe	Ambanjabe	-16.3223	46.7154	female	paired-end	3942172	3328190	2224802	69679	8.01091	2	0	depth too low			PRJNA807164	5
Microcebus murinus	Mmur_f152y14_mari_S12	Mariarano	-15.4685	46.7043	female	single-end	1187646	809766	580082	34265	8.12292	1	0	depth too low			PRJNA807164	SE 543
Microcebus murinus	Mmur_f370y18_jabe	Ambanjabe	-16.2906	46.6917	female	paired-end	4357484	3457682	2549010	75739	8.43777	10	0	depth too low			PRJNA807164	11
Microcebus murinus	Mmur_f45y13_mari_S12	Mariarano	-15.4678	46.7069	female	single-end	1387144	998499	627502	35144	8.47581	0	0	depth too low			PRJNA807164	SE 543
Microcebus murinus	Mmur_f199y17_jabe	Ambanjabe	-16.3226	46.7158	female	paired-end	4433530	3721190	2440126	70467	8.68814	0	0	depth too low			PRJNA807164	5
Microcebus murinus	Mmur_m102y14_mari_S12	Mariarano	-15.4618	46.7277	male	single-end	1824786	1107221	723172	39628	8.70556	1	0	depth too low			PRJNA807164	SE 543
Microcebus murinus	Mmur_f37y14_mari_S12	Mariarano	-15.4705	46.7054	female	single-end	1373824	1071160	665095	36406	8.76792	2	0	depth too low			PRJNA807164	SE 543
Microcebus murinus	Mmur_f59y13_mari_S12	Mariarano	-15.4678	46.7069	female	single-end	1418791	1081518	704354	38432	8.84427	0	0	depth too low			PRJNA807164	SE 543
Microcebus murinus	Mmur_f23y14_mari_S12	Mariarano	-15.4702	46.7045	female	single-end	1676193	1239665	709182	36683	9.09026	0	0	depth too low	×		PRJNA807164	SE 543
Microcebus murinus	Mmur_f159y14_mari_S12	Mariarano	-15.4686	46.7046	female	single-end	1638090	1075513	795304	41685	9.15584	0	0	depth too low			PRJNA807164	SE 543
Microcebus murinus	Mmur_f190y17_jabe	Ambanjabe	-16.3087	46.6945	female	paired-end	4611132	3876414	2593634	70317	9.25989	6	0	depth too low			PRJNA807164	5
Microcebus murinus	Mmur_m83y13_mari_S12	Mariarano	-15.468	46.7078	male	single-end	1587145	1258791	853703	42903	9.31028	0	0	depth too low	×		PRJNA807164	SE 543
Microcebus murinus	Mmur_m17y14_mari_S12	Mariarano	-15.4693	46.7055	male	single-end	1547668	1069662	806159	41130	9.32964	1	0	depth too low			PRJNA807164	SE 543
Microcebus murinus	Mmur_m30y14_mari_S12	Mariarano	-15.4707	46.7059	male	single-end	1830632	1478215	811800	41832	9.33372	16	0	depth too low			PRJNA807164	SE 543
Microcebus murinus	Mmur_f166y14_mari_S12	Mariarano	-15.4711	46.7059	female	single-end	1718770	1283917	758957	37686	9.41764	3	0	depth too low	×		PRJNA807164	SE 543
Microcebus murinus	Mmur_f187y17_jabe	Ambanjabe	-16.3278	46.6987	female	paired-end	4715582	3966262	2663650	70397	9.48435	0	0	depth too low			PRJNA807164	5
Microcebus murinus	Mmur_f21y14_mari_S12	Mariarano	-15.4685	46.7043	female	single-end	1715992	1315709	854362	42372	9.60271	22	0	depth too low	×		PRJNA807164	SE 543
Microcebus murinus	Mmur_m37y13_mari_S12	Mariarano	-15.4695	46.7094	male	single-end	1608184	1273261	888774	43218	9.92552	4	0	depth too low			PRJNA807164	SE 543
Microcebus murinus	Mmur_f104y14_mari_S12	Mariarano	-15.4622	46.7266	female	single-end	2138019	1722525	939682	44399	10.204	2	0	depth too low			PRJNA807164	SE 543
Microcebus murinus	Mmur_m16y14_ampi_S12	Ampijoroa	-16.3201	46.7996	male	single-end	2037866	2006569	976775	46326	10.5093	7	0	depth too low			PRJNA807164	SE 542
Microcebus murinus	Mmur_f07y14_mari_S12	Mariarano	-15.4706	46.7062	female	single-end	1923852	1521474	1081891	47530	10.8197	6	0	depth too low	×		PRJNA807164	SE 543
Microcebus murinus	Mmur_f165y17_jabe	Ambanjabe	-16.3283	46.6993	female	paired-end	5454076	4604998	3090248	70812	10.9451	0	0	depth too low			PRJNA807164	5
Microcebus murinus	Mmur_f48y13_mari_S12	Mariarano	-15.4677	46.706	female	single-end	2246919	1561737	1098736	47737	10.9901	0	0	depth too low			PRJNA807164	SE 543
Microcebus murinus	Mmur_f189y17_jabe	Ambanjabe	-16.3088	46.6945	female	paired-end	5806468	4874342	3214067	71120	11.3232	0	0	depth too low			PRJNA807164	5
Microcebus murinus	Mmur_f183y17_jabe	Ambanjabe	-16.3031	46.7229	female	paired-end	6337336	5956414	3529139	75626	11.7034	0	0	depth too low			PRJNA807164	22
Microcebus murinus	Mmur_m22y13_ampi_S12	Ampijoroa	-16.3194	46.8087	male	single-end	2053533	2024682	1194439	50072	11.8355	6	0	depth too low			PRJNA807164	SE 542
Microcebus murinus	Mmur_m186y17_jabe	Ambanjabe	-16.3407	46.7112	male	paired-end	6401408	6026072	3690703	75928	12.1959	0	0	depth too low			PRJNA807164	22
Microcebus murinus	Mmur_m4y14_mari_S12	Mariarano	-15.4686	46.7046	male	single-end	2457123	1980772	1254564	49072	12.2489	2	0	depth too low	×		PRJNA807164	SE 543
Microcebus murinus	Mmur_f198y17_jabe	Ambanjabe	-16.3407	46.7114	female	paired-end	6565864	6181372	3726793	75968	12.3315	2	0	depth too low			PRJNA807164	22
Microcebus murinus	Mmur_58y03_anko	Ankoririka	-16.2562	47.047	male	paired-end	7303426	6749978	3778267	75670	12.5561	0	0	depth too low			PRJNA807164	21
Microcebus murinus	Mmur_m103y17_jabe	Ambanjabe	-16.3073	46.6966	male	paired-end	6557048	5780222	3605029	70660	12.7912	0	0	depth too low			PRJNA807164	5
Microcebus murinus	Mmur_m66y17_jabe	Ambanjabe	-16.329	46.7211	male	paired-end	6769880	5960796	3691134	71081	13.0088	2	0	depth too low			PRJNA807164	5
Microcebus murinus	Mmur_f144y17_anko_S2	Ankomakoma	-16.3469	46.7448	female	paired-end	6469406	5418882	4000176	74923	13.3993	2	0	depth too low			PRJNA807164	15
Microcebus murinus	Mmur_f193y17_jabe	Ambanjabe	-16.3406	46.7109	female	paired-end	7897222	7334486	4238143	76451	13.9149	4	0	depth too low			PRJNA807164	22
Microcebus murinus	Mmur_m133y17_jabe	Ambanjabe	-16.3287	46.7159	male	paired-end	7741092	7178608	4437278	76706	14.5218	8	0	depth too low			PRJNA807164	21
Microcebus murinus	Mmur_m188y17_jabe	Ambanjabe	-16.328	46.699	male	paired-end	7519158	6296178	4214554	72018	14.6597	0	0	depth too low			PRJNA807164	5
Microcebus murinus	Mmur_m239y18_mari	Mariarano	-15.4745	46.6877	male	paired-end	7544594	7082434	4515329	77272	14.6854	0	0	depth too low			PRJNA807164	22
Microcebus murinus	Mmur_f135y18_mari	Mariarano	-15.5213	46.7065	female	paired-end	7636812	7176292	4575982	77644	14.7791	0	0	depth too low			PRJNA807164	22
Microcebus murinus	Mmur_m75y18_mari	Mariarano	-15.5165	46.7056	male	paired-end	7676548	6091132	4546818	76716	14.8505	16	0	depth too low			PRJNA807164	11
Microcebus murinus	Mmur_m375y18_jabe	Ambanjabe	-16.287	46.7113	male	paired-end	7634312	7180998	4563794	76512	14.9717	2	0	depth too low			PRJNA807164	22
Microcebus murinus	Mmur_f191y17_jabe	Ambanjabe	-16.3233	46.6899	female	paired-end	7972634	6708482	4398832	72245	15.2577	0	0	depth too low			PRJNA807164	5
Microcebus murinus	Mmur_m143y17_anko	Ankomakoma	-16.3468	46.7458	male	paired-end	6847522	6085798	4388888	71726	15.326	4	0	depth too low			PRJNA560399	4
Microcebus murinus	Mmur_f70y17_jabe	Ambanjabe	-16.3284	46.7191	female	paired-end	8735344	7704534	4577570	71519	16.0477	0	0	depth too low			PRJNA807164	5
Microcebus murinus	Mmur_f107y17_anko	Ankomakoma	-16.3463	46.7407	female	paired-end	7336972	6534808	4672121	72258	16.1715	0	0	depth too low			PRJNA560399	4
Microcebus murinus	Mmur_f02y13_ampi_S12	Ampijoroa	-16.3178	46.8089	female	single-end	3435401	2827319	1899233	58676	16.1959	0	0	depth too low			PRJNA807164	SE 542
Microcebus murinus	Mmur_m117y17_koma	Ankomakoma	-16.3463	46.7405	male	paired-end	8543000	7954820	5036844	77426	16.3165	2	0	depth too low		×	PRJNA807164	21
Microcebus murinus	Mmur_f04y14_ampi_S12	Ampijoroa	-16.3231	46.7926	female	single-end	3372433	3322327	2064977	60913	16.9454	0	0	depth too low			PRJNA807164	SE 542
Microcebus murinus	Mmur_74y03_anko	Ankoririka	-16.2541	47.0459	female	paired-end	9533038	8786076	5131501	75845	16.9767	2	0	depth too low			PRJNA807164	21
Microcebus murinus	Mmur_m66y11_ampi_S12	Ampijoroa	-16.3201	46.8103	male	single-end	3751664	3697679	2072969	60372	17.2335	0	0	depth too low			PRJNA807164	SE 542
Microcebus murinus	Mmur_f148y17_anko	Ankomakoma	-16.3451	46.7429	female	paired-end	8909372	7414120	5360387	77250	17.4099	0	0	depth too low			PRJNA560399	4
Microcebus murinus	Mmur_m49y17_jabe	Ambanjabe	-16.3282	46.7183	male	paired-end	9599282	8458480	5030464	72269	17.4517	2	0	depth too low		×	PRJNA807164	5
Microcebus murinus	Mmur_f369y18_jabe	Ambanjabe	-16.2932	46.691	female	paired-end	8926442	8318814	5374160	77159	17.4845	4	0	depth too low			PRJNA807164	21
Microcebus murinus	Mmur_f64y17_jabe	Ambanjabe	-16.3307	46.7255	female	paired-end	10092678	8869914	5152458	72476	17.8072	0	0	depth too low		×	PRJNA807164	5
Microcebus murinus	Mmur_m209y18_mari	Mariarano	-15.5065	46.6951	male	paired-end	10190762	9548082	5701659	79642	17.9814	0	0	depth too low		×	PRJNA807164	22
Microcebus murinus	Mmur_m50y13_ampi_S12	Ampijoroa	-16.3231	46.8055	male	single-end	3334381	3285921	2217671	61132	18.0582	0	0	depth too low			PRJNA807164	SE 542
Microcebus murinus	Mmur_m130y17_mari	Mariarano	-15.4813	46.6345	male	paired-end	9770930	9153922	5661591	77849	18.2443	0	0	depth too low		×	PRJNA807164	22
Microcebus murinus	Mmur_m136y17_jabe	Ambanjabe	-16.3049	46.7098	male	paired-end	9668740	8968392	5771216	78867	18.3619	4	0	depth too low			PRJNA807164	21
Microcebus murinus	Mmur_71y03_anko	Ankoririka	-16.2528	47.0474	female	paired-end	10656102	9881140	5623695	76414	18.4842	6	0	depth too low		×	PRJNA807164	21
Microcebus murinus	Mmur_m44y13_ampi_S12	Ampijoroa	-16.3216	46.8053	male	single-end	3538361	3487803	2392239	61671	19.3328	0	0	depth too low			PRJNA807164	SE 542
Microcebus murinus	Mmur_m54y17_rav	Ravelobe	-16.3078	46.8251	male	paired-end	10173474	8441466	6157359	78153	19.782	2	0	depth too low			PRJNA560399	4
Microcebus murinus	Mmur_m48y18_mari	Mariarano	-15.5311	46.7268	male	paired-end	10377560	9677654	6304702	78831	20.0692	0	0	depth too low			PRJNA807164	21
Microcebus murinus	Mmur_m152y17_anko	Ankomakoma	-16.3442	46.7427	male	paired-end	10326344	8738162	6259727	77761	20.1711	0	0	depth too low		×	PRJNA807164	15
Microcebus murinus	Mmur_f56y13_mari_S12	Mariarano	-15.4682	46.7079	female	single-end	2017840	1645078	1005071	43911	20.9191	6	0	depth too low			PRJNA807164	SE 543
Microcebus murinus	Mmur_m53y11_ampi_S12	Ampijoroa	-16.3206	46.8076	male	single-end	4162365	4100456	2800699	65661	21.3982	20	0	depth too low			PRJNA807164	SE 542
Microcebus murinus	Mmur_m372y18_jabe	Ambanjabe	-16.2864	46.7118	male	paired-end	11638224	10962058	6877453	80498	21.4385	2	0	depth too low			PRJNA807164	22
Microcebus murinus	Mmur_f41y12_ampi_S12	Ampijoroa	-16.3098	46.7916	female	single-end	4267844	4201252	2779576	64219	21.5191	14	0	depth too low			PRJNA807164	SE 542
Microcebus murinus	Mmur_m100y12_ampi_S12	Ampijoroa	-16.3036	46.7928	male	single-end	4288628	4204929	3084654	65573	23.2293	7	0	depth too low			PRJNA807164	SE 542
Microcebus murinus	Mmur_f15y12_ampi_S12	Ampijoroa	-16.3085	46.7924	female	single-end	5078858	4545458	3066444	65417	23.2344	33	0	depth too low			PRJNA807164	SE 542
Microcebus murinus	Mmur_m43y18_mari	Mariarano	-15.5236	46.7275	male	paired-end	13569922	12746372	7957405	82788	24.1483	0	0	depth too low		×	PRJNA807164	22
Microcebus murinus	Mmur_m110y12_ampi_S12	Ampijoroa	-16.3036	46.7915	male	single-end	4875218	4789941	3288399	66518	24.3509	19	0	depth too low			PRJNA807164	SE 542
Microcebus murinus	Mmur_f05y12_ampi_S12	Ampijoroa	-16.3198	46.8	female	single-end	5018544	4936207	3439545	65093	26.0558	4	0	depth too low			PRJNA807164	SE 542
Microcebus murinus	Mmur_f69y12_ampi_S12	Ampijoroa	-16.3035	46.794	female	single-end	5324124	5243003	3794800	65193	29.0709	5	0	depth too low			PRJNA807164	SE 542
Microcebus murinus	Mmur_f21y12_ampi_S12	Ampijoroa	-16.3031	46.7957	female	single-end	5762183	5668048	4304716	68054	31.4159	25	0	depth too low			PRJNA807164	SE 542
Microcebus murinus	Mmur_m83y12_ampi_S12	Ampijoroa	-16.3092	46.7916	male	single-end	7334132	7217379	5458140	69191	38.8353	5	0	depth too low			PRJNA807164	SE 542
Microcebus murinus	Mmur_f04y12_ampi_S12	Ampijoroa	-16.3098	46.7916	female	single-end	9817424	9653272	6273607	71435	43.3537	33	0	depth too low			PRJNA807164	SE 542
Microcebus murinus	Mmur_m99y12_ampi_S12	Ampijoroa	-16.3089	46.792	male	single-end	11798581	11599953	8250812	69356	59.2354	25	0	depth too low			PRJNA807164	SE 542
Microcebus murinus	Mmur_m64y12_ampi_S12	Ampijoroa	-16.3226	46.7994	male	single-end	12387146	12159473	8257257	67832	60.9339	9	0	depth too low			PRJNA807164	SE 542
Microcebus murinus	Mmur_f108y17_anko	Ankomakoma	-16.3431	46.7414	female	paired-end	2324622	2080814	1548354	68003	5.69212	4	1	depth too low			PRJNA560399	4
Microcebus murinus	Mmur_m76y17_jabe	Ambanjabe	-16.3257	46.7154	male	paired-end	3048212	2843292	1846297	71301	6.49789	2	1	depth too low			PRJNA807164	21
Microcebus murinus	Mmur_m115y17_jabe	Ambanjabe	-16.3097	46.695	male	paired-end	3300034	2897378	1806024	67604	6.69219	6	1	depth too low			PRJNA807164	5
Microcebus murinus	Mmur_f192y17_jabe	Ambanjabe	-16.3233	46.6899	female	paired-end	3733306	3173988	2144469	70097	7.66678	4	1	depth too low			PRJNA807164	5
Microcebus murinus	Mmur_m153y17_anko	Ankomakoma	-16.3438	46.7422	male	paired-end	3306126	2970310	2180055	70937	7.69591	10	1	depth too low			PRJNA560399	4
Microcebus murinus	Mmur_m116y17_anko	Ankomakoma	-16.3463	46.7407	male	paired-end	3600044	3050500	2363277	72179	8.22728	2	1	depth too low			PRJNA560399	4
Microcebus murinus	Mmur_f189y18_mari	Mariarano	-15.5076	46.6896	female	paired-end	4290138	3433586	2652901	79343	8.38189	8	1	depth too low			PRJNA807164	11
Microcebus murinus	Mmur_f364y18_jabe	Ambanjabe	-16.2975	46.7029	female	paired-end	4270446	3367064	2499307	73170	8.55259	10	1	depth too low			PRJNA807164	11
Microcebus murinus	Mmur_f164y17_jabe	Ambanjabe	-16.3278	46.6987	female	paired-end	4406380	3696156	2497855	70472	8.8896	2	1	depth too low			PRJNA807164	5
Microcebus murinus	Mmur_m56y17_jabe	Ambanjabe	-16.3269	46.7138	male	paired-end	4966320	4312380	2612696	71031	9.21978	6	1	depth too low			PRJNA807164	5
Microcebus murinus	Mmur_m87y17_jabe	Ambanjabe	-16.3282	46.7183	male	paired-end	4784536	4138646	2571876	69777	9.23908	2	1	depth too low			PRJNA807164	5
Microcebus murinus	Mmur_m110y17_anko	Ankomakoma	-16.3439	46.7423	male	paired-end	4345738	3688790	2836838	73208	9.62342	2	1	depth too low			PRJNA560399	4
Microcebus murinus	Mmur_m110y17_jabe	Ambanjabe	-16.317	46.6967	male	paired-end	4811482	4242614	2660883	69236	9.72263	4	1	depth too low			PRJNA807164	5
Microcebus murinus	Mmur_f154y17_jabe	Ambanjabe	-16.3251	46.692	female	paired-end	4787364	4064748	2752147	70136	9.81838	4	1	depth too low			PRJNA807164	5
Microcebus murinus	Mmur_f105y17_mari	Mariarano	-15.4819	46.6334	female	paired-end	5492752	4072288	3090971	77384	10.0168	24	1	depth too low			PRJNA807164	11
Microcebus murinus	Mmur_m86y17_jabe	Ambanjabe	-16.3305	46.7247	male	paired-end	5299960	4667660	2902189	71080	10.2275	4	1	depth too low			PRJNA807164	5
Microcebus murinus	Mmur_f65y17_jabe	Ambanjabe	-16.3289	46.7209	female	paired-end	5341958	4479774	2940974	71384	10.3239	6	1	depth too low			PRJNA807164	5
Microcebus murinus	Mmur_f147y17_jabe	Ambanjabe	-16.325	46.6919	female	paired-end	6385728	5606046	3082056	70828	10.9024	12	1	depth too low			PRJNA807164	5
Microcebus murinus	Mmur_f196y17_jabe	Ambanjabe	-16.3224	46.7156	female	paired-end	5712668	4835714	3135766	71111	11.0362	6	1	depth too low			PRJNA807164	5
Microcebus murinus	Mmur_m32y17_jabe	Ambanjabe	-16.314	46.7058	male	paired-end	6565876	6103144	3603008	75210	12.0262	4	1	depth too low			PRJNA807164	22
Microcebus murinus	Mmur_f359y18_jabe	Ambanjabe	-16.287	46.7195	female	paired-end	6115530	5766626	3676534	75645	12.1757	2	1	depth too low			PRJNA807164	22
Microcebus murinus	Mmur_f374y18_jabe	Ambanjabe	-16.2901	46.7147	female	paired-end	8250928	6570342	4959111	100408	12.3855	56	1	depth too low			PRJNA807164	11
Microcebus murinus	Mmur_f108y17_jabe_S1	Ambanjabe	-16.3148	46.6977	female	paired-end	6791956	5691866	3695043	71758	12.914	2	1	depth too low			PRJNA807164	5
Microcebus murinus	Mmur_m173y18_mari	Mariarano	-15.5067	46.6948	male	paired-end	6818978	6395472	4010793	76172	13.2162	4	1	depth too low			PRJNA807164	22
Microcebus murinus	Mmur_m38y17_jabe	Ambanjabe	-16.3142	46.7053	male	paired-end	7553818	7041504	4115027	76645	13.4723	2	1	depth too low			PRJNA807164	22
Microcebus murinus	Mmur_f201y17_jabe	Ambanjabe	-16.3217	46.7218	female	paired-end	7172106	6667380	4206612	75951	13.899	8	1	depth too low			PRJNA807164	21
Microcebus murinus	Mmur_f118y17_jabe	Ambanjabe	-16.3068	46.697	female	paired-end	7810752	7318148	4256023	76561	13.9584	2	1	depth too low			PRJNA807164	22
Microcebus murinus	Mmur_f104y17_koma	Ankomakoma	-16.3448	46.7385	female	paired-end	7732748	7177998	4397951	77246	14.2837	8	1	depth too low			PRJNA807164	21
Microcebus murinus	Mmur_f143y17_jabe	Ambanjabe	-16.3014	46.7153	female	paired-end	7319444	6804462	4343360	75933	14.3586	12	1	depth too low			PRJNA807164	21
Microcebus murinus	Mmur_f106y17_jabe	Ambanjabe	-16.3151	46.6976	female	paired-end	8138184	7630622	4495503	77106	14.6709	2	1	depth too low			PRJNA807164	22
Microcebus murinus	Mmur_f349y18_mari_S2	Mariarano	-15.3746	46.7399	female	paired-end	7442622	6907764	4585934	76412	15.0698	10	1	depth too low			PRJNA807164	21
Microcebus murinus	Mmur_m254y18_mari	Mariarano	-15.4746	46.6878	male	paired-end	7947450	7480734	4681096	77614	15.142	2	1	depth too low			PRJNA807164	22
Microcebus murinus	Mmur_f111y17_jabe	Ambanjabe	-16.3155	46.6975	female	paired-end	8062758	6769922	4373230	71967	15.2257	2	1	depth too low			PRJNA807164	5
Microcebus murinus	Mmur_m92y17_rav	Ravelobe	-16.3086	46.8242	male	paired-end	7657852	6841326	4474015	71886	15.5725	2	1	depth too low		×	PRJNA560399	4
Microcebus murinus	Mmur_f142y17_jabe	Ambanjabe	-16.3035	46.7146	female	paired-end	8235256	7667596	4813543	76227	15.8282	6	1	depth too low			PRJNA807164	21
Microcebus murinus	Mmur_f216y18_mari	Mariarano	-15.502	46.6898	female	paired-end	8340426	7862650	4974789	78875	15.8518	12	1	depth too low			PRJNA807164	22
Microcebus murinus	Mmur_m78y17_jabe	Ambanjabe	-16.3292	46.7217	male	paired-end	8629860	7211594	4652617	72341	16.1201	6	1	depth too low			PRJNA807164	5
Microcebus murinus	Mmur_m107y18_mari	Mariarano	-15.5217	46.7067	male	paired-end	8144194	7669404	5048098	77904	16.2441	2	1	depth too low			PRJNA807164	22
Microcebus murinus	Mmur_m185y17_jabe	Ambanjabe	-16.3405	46.7106	male	paired-end	8794354	8243374	5160298	77330	16.7449	8	1	depth too low			PRJNA807164	22
Microcebus murinus	Mmur_m134y18_mari	Mariarano	-15.5223	46.707	male	paired-end	8413082	7972812	5243778	78554	16.7651	10	1	depth too low			PRJNA807164	22
Microcebus murinus	Mmur_70y03_anko	Ankoririka	-16.2576	47.0491	male	paired-end	10051814	9299130	5256204	76793	17.1935	4	1	depth too low			PRJNA807164	21
Microcebus murinus	Mmur_68y03_anko	Ankoririka	-16.2592	47.05	male	paired-end	10451738	9639634	5468490	76743	17.875	2	1	depth too low			PRJNA807164	21
Microcebus murinus	Mmur_f110y18_mari	Mariarano	-15.5219	46.7069	female	paired-end	9367004	8803198	5685419	78261	18.2307	8	1	depth too low		×	PRJNA807164	22
Microcebus murinus	Mmur_f12y18_mari_S2	Mariarano	-15.5093	46.7258	female	paired-end	9313322	8736548	5886943	77148	19.1528	4	1	depth too low		×	PRJNA807164	21
Microcebus murinus	Mmur_f181y17_jabe	Ambanjabe	-16.3028	46.7225	female	paired-end	11487004	10732916	6489014	79886	20.3993	4	1	depth too low			PRJNA807164	22
Microcebus murinus	Mmur_73y03_anko	Ankoririka	-16.2527	47.048	female	paired-end	16150568	14903872	6768407	79452	21.3787	10	1	depth too low		×	PRJNA807164	21
Microcebus murinus	Mmur_f37y18_mari_S2	Mariarano	-15.5087	46.7256	female	paired-end	15377474	14275848	9020901	82554	27.4542	2	1	depth too low			PRJNA807164	21
Microcebus murinus	Mmur_m53y13_mari_S12	Mariarano	-15.4679	46.7072	male	single-end	6954568	5376345	4144612	64946	30.5027	11	1	depth too low			PRJNA807164	SE 543
Microcebus murinus	Mmur_f186y18_mari	Mariarano	-15.5083	46.6892	female	paired-end	3055170	2437952	1871171	73525	6.37712	17	2	depth too low			PRJNA807164	11
Microcebus murinus	Mmur_m53y17_jabe	Ambanjabe	-16.3287	46.7202	male	paired-end	3508042	3251110	2078035	71493	7.28284	4	2	depth too low			PRJNA807164	21
Microcebus murinus	Mmur_m114y17_jabe	Ambanjabe	-16.3093	46.6948	male	paired-end	3855272	3236650	2198872	69407	7.93443	4	2	depth too low			PRJNA807164	5
Microcebus murinus	Mmur_f178y17_jabe	Ambanjabe	-16.3278	46.6987	female	paired-end	4091688	3458604	2330640	69820	8.36402	6	2	depth too low			PRJNA807164	5
Microcebus murinus	Mmur_f47y18_mari	Mariarano	-15.5233	46.7284	female	paired-end	4239358	3411840	2714482	76799	8.8715	10	2	depth too low			PRJNA807164	11
Microcebus murinus	Mmur_m353y18_mari	Mariarano	-15.3626	46.7447	male	paired-end	4219990	3392512	2654277	72633	9.17071	8	2	depth too low			PRJNA807164	11
Microcebus murinus	Mmur_m115y17_anko	Ankomakoma	-16.3463	46.7407	male	paired-end	4131774	3485842	2698848	72575	9.34042	4	2	depth too low			PRJNA560399	4
Microcebus murinus	Mmur_f33y17_jabe	Ambanjabe	-16.3187	46.7147	female	paired-end	5978334	5222096	2887572	71100	10.1916	10	2	depth too low			PRJNA807164	5
Microcebus murinus	Mmur_m54y17_rav	Ravelobe	-16.3078	46.8251	male	paired-end	6221496	4931178	3410585	71888	11.8804	8	2	depth too low			PRJNA560399	4
Microcebus murinus	Mmur_f106y17_anko	Ankomakoma	-16.3461	46.74	female	paired-end	5544290	4936354	3487251	72147	12.1069	16	2	depth too low			PRJNA560399	4
Microcebus murinus	Mmur_f191y18_mari	Mariarano	-15.4969	46.684	female	paired-end	6961872	5465914	3882372	77157	12.6279	14	2	depth too low			PRJNA807164	11
Microcebus murinus	Mmur_f182y17_jabe	Ambanjabe	-16.303	46.7227	female	paired-end	7008466	6529310	3941026	76021	13.0156	16	2	depth too low			PRJNA807164	22
Microcebus murinus	Mmur_f362y18_jabe	Ambanjabe	-16.2853	46.7151	female	paired-end	6746922	6372030	4067340	76658	13.3219	8	2	depth too low			PRJNA807164	22
Microcebus murinus	Mmur_m112y17_anko	Ankomakoma	-16.3462	46.7441	male	paired-end	6165516	5471682	3988901	72628	13.7666	12	2	depth too low			PRJNA560399	4
Microcebus murinus	Mmur_f222y18_mari	Mariarano	-15.506	46.694	female	paired-end	7945710	7470300	4526295	77313	14.7103	6	2	depth too low			PRJNA807164	22
Microcebus murinus	Mmur_m137y17_jabe	Ambanjabe	-16.3003	46.7324	male	paired-end	8039208	7517308	4667367	77548	15.1215	14	2	depth too low			PRJNA807164	22
Microcebus murinus	Mmur_f118y17_koma	Ankomakoma	-16.3463	46.7402	female	paired-end	9489304	8785528	5427451	77483	17.5871	8	2	depth too low		×	PRJNA807164	21
Microcebus murinus	Mmur_f102y18_mari	Mariarano	-15.5286	46.7071	female	paired-end	9070876	8439718	5538454	78532	17.7126	6	2	depth too low		×	PRJNA807164	21
Microcebus murinus	Mmur_m126y17_jabe	Ambanjabe	-16.2997	46.7316	male	paired-end	10001436	9351228	5798672	79788	18.2566	6	2	depth too low			PRJNA807164	22
Microcebus murinus	Mmur_f106y18_mari	Mariarano	-15.5213	46.7065	female	paired-end	9535702	8954080	5788855	78543	18.5078	14	2	depth too low		×	PRJNA807164	22
Microcebus murinus	Mmur_f177y17_jabe	Ambanjabe	-16.305	46.7163	female	paired-end	10404026	9772484	5883954	79522	18.5737	8	2	depth too low			PRJNA807164	22
Microcebus murinus	Mmur_59y03_anko	Ankoririka	-16.257	47.0481	male	paired-end	10446558	9641078	5709107	76425	18.733	8	2	depth too low		×	PRJNA807164	21
Microcebus murinus	Mmur_m338y18_mari_S2	Mariarano	-15.3752	46.7404	male	paired-end	9420790	8843192	5973948	76768	19.5108	4	2	depth too low		×	PRJNA807164	21
Microcebus murinus	Mmur_m77y18_mari	Mariarano	-15.5151	46.7337	male	paired-end	3144558	2489986	1946889	75664	6.45532	16	3	depth too low			PRJNA807164	11
Microcebus murinus	Mmur_m100y18_mari	Mariarano	-15.5276	46.7068	male	paired-end	5126124	4137782	3281294	84521	9.73159	101	3	depth too low			PRJNA807164	11
Microcebus murinus	Mmur_m123y17_mari	Ambanjabe	-16.2997	46.7317	male	paired-end	6821396	6340838	3964711	76052	13.0729	14	3	depth too low			PRJNA807164	21
Microcebus murinus	Mmur_m253y18_mari	Mariarano	-15.4749	46.6882	male	paired-end	7254540	6826238	4343477	77726	14.0479	10	3	depth too low			PRJNA807164	22
Microcebus murinus	Mmur_m44y17_jabe	Ambanjabe	-16.3304	46.7245	male	paired-end	8940988	7813016	4180410	72527	14.4646	12	3	depth too low			PRJNA807164	5
Microcebus murinus	Mmur_f62y17_jabe	Ambanjabe	-16.3308	46.7256	female	paired-end	9811092	7870310	4321351	72219	15.0189	12	3	depth too low			PRJNA807164	5
Microcebus murinus	Mmur_f30y17_jabe	Ambanjabe	-16.3215	46.7214	female	paired-end	9236430	8464666	4681365	76547	15.3391	8	3	depth too low			PRJNA807164	21
Microcebus murinus	Mmur_f106y17_mari	Mariarano	-15.4813	46.6345	female	paired-end	8419454	7880152	4863883	77195	15.8248	10	3	depth too low			PRJNA807164	22
Microcebus murinus	Mmur_m277y18_mari	Mariarano	-15.4745	46.6877	male	paired-end	8806666	8262702	5088321	80185	15.9313	12	3	depth too low			PRJNA807164	22
Microcebus murinus	Mmur_f39y17_jabe	Ambanjabe	-16.314	46.7058	female	paired-end	9219736	8624340	5047525	78047	16.227	16	3	depth too low			PRJNA807164	22
Microcebus murinus	Mmur_m124y17_jabe	Ambanjabe	-16.2996	46.7315	male	paired-end	9084160	8491564	5261227	78589	16.8347	6	3	depth too low			PRJNA807164	22
Microcebus murinus	Mmur_m99y17_jabe	Ambanjabe	-16.3163	46.6971	male	paired-end	11615288	10137442	5564249	70973	19.6365	6	3	depth too low			PRJNA807164	5
Microcebus murinus	Mmur_m47y17_jabe	Ambanjabe	-16.3288	46.7204	male	paired-end	3642776	3211556	1830216	67690	6.78143	20	4	depth too low			PRJNA807164	5
Microcebus murinus	Mmur_m69y17_jabe	Ambanjabe	-16.3284	46.7191	male	paired-end	4684568	4067470	2513763	70000	8.99163	16	4	depth too low			PRJNA807164	5
Microcebus murinus	Mmur_m93y17_rav	Ravelobe	-16.3081	46.8246	male	paired-end	4034328	3594738	2554124	70253	9.11321	12	4	depth too low			PRJNA560399	4
Microcebus murinus	Mmur_m130y18_mari	Mariarano	-15.5139	46.7356	male	paired-end	5010044	3981522	3111984	81085	9.61212	22	4	depth too low			PRJNA807164	11
Microcebus murinus	Mmur_f116y18_mari	Mariarano	-15.5146	46.7346	female	paired-end	5152370	4099418	3254367	82776	9.86392	21	4	depth too low			PRJNA807164	11
Microcebus murinus	Mmur_f373y18_jabe	Ambanjabe	-16.2905	46.6918	female	paired-end	5090320	4056862	3130251	74897	10.4833	10	4	depth too low			PRJNA807164	11
Microcebus murinus	Mmur_f73y18_mari	Mariarano	-15.5166	46.7059	female	paired-end	5459532	4355444	3391419	79963	10.6472	26	4	depth too low			PRJNA807164	11
Microcebus murinus	Mmur_m147y17_anko	Ankomakoma	-16.3456	46.7433	male	paired-end	5396558	4808882	3527143	72192	12.2346	18	4	depth too low			PRJNA560399	4
Microcebus murinus	Mmur_f145y17_anko	Ankomakoma	-16.3469	46.7446	female	paired-end	6816792	6089160	4309842	72389	14.9218	12	4	depth too low		×	PRJNA560399	4
Microcebus murinus	Mmur_f108y18_mari	Mariarano	-15.5217	46.7067	female	paired-end	7885460	7406750	4778616	77241	15.5291	16	4	depth too low			PRJNA807164	22
Microcebus murinus	Mmur_m169y18_mari	Mariarano	-15.5063	46.6944	male	paired-end	9379070	8757946	5392387	79046	17.1267	16	4	depth too low			PRJNA807164	22
Microcebus murinus	Mmur_f105y18_mari	Mariarano	-15.528	46.7067	female	paired-end	16054342	14908260	9254075	84641	27.4818	8	4	depth too low		×	PRJNA807164	21
Microcebus murinus	Mmur_m115y17_mari	Mariarano	-15.465	46.6299	male	paired-end	4066636	3270330	2455493	89410	6.88793	182	5	depth too low			PRJNA807164	11
Microcebus murinus	Mmur_f122y18_mari	Mariarano	-15.5292	46.7079	female	paired-end	4343732	3471568	2633421	80012	8.2514	26	5	depth too low			PRJNA807164	11
Microcebus murinus	Mmur_m53y17_rav	Ravelobe	-16.3068	46.826	male	paired-end	4706762	4178006	2768752	71033	9.77049	12	5	depth too low			PRJNA560399	4
Microcebus murinus	Mmur_m77y17_jabe	Ambanjabe	-16.3271	46.7135	male	paired-end	7576568	7069196	4272821	76056	14.1074	16	5	depth too low			PRJNA807164	22
Microcebus murinus	Mmur_m179y18_mari	Mariarano	-15.5045	46.6965	male	paired-end	7556358	7107018	4453262	76656	14.5831	10	5	depth too low			PRJNA807164	22
Microcebus murinus	Mmur_m368y18_jabe	Ambanjabe	-16.2871	46.7113	male	paired-end	7670818	7132808	4596073	76611	15.0573	14	5	depth too low			PRJNA807164	21
Microcebus murinus	Mmur_f328y18_mari_S2	Mariarano	-15.3624	46.7446	female	paired-end	9521038	8880732	5772369	77337	18.7255	18	5	depth too low			PRJNA807164	21
Microcebus murinus	Mmur_f80y12_ampi_S12	Ampijoroa	-16.3238	46.7998	female	single-end	9699264	9506363	6344678	68422	45.2933	50	5	depth too low			PRJNA807164	SE 542
Microcebus murinus	Mmur_f97y18_mari	Mariarano	-15.5288	46.7073	female	paired-end	3333640	2681344	2100633	73694	7.14104	18	6	depth too low			PRJNA807164	11
Microcebus murinus	Mmur_f58y17_jabe	Ambanjabe	-16.326	46.7148	female	paired-end	5426268	4528258	2948101	71280	10.352	12	6	depth too low			PRJNA807164	5
Microcebus murinus	Mmur_f203y17_jabe	Ambanjabe	-16.3053	46.7161	female	paired-end	7206658	6769198	4133864	77175	13.4506	18	6	depth too low			PRJNA807164	22
Microcebus murinus	Mmur_f152y17_jabe	Ambanjabe	-16.3233	46.6898	female	paired-end	3278048	3048602	1921368	72463	6.64757	34	7	depth too low	×		PRJNA807164	21
Microcebus murinus	Mmur_m54y18_mari	Mariarano	-15.5166	46.7072	male	paired-end	4206272	3397238	2695721	79457	8.52086	83	7	depth too low			PRJNA807164	11
Microcebus murinus	Mmur_m91y17_rav	Ravelobe	-16.3096	46.8231	male	paired-end	4131552	3684524	2627792	70369	9.35057	20	7	depth too low			PRJNA560399	4
Microcebus murinus	Mmur_m111y18_mari	Mariarano	-15.5213	46.7065	male	paired-end	9059882	8468982	5111554	79223	16.219	38	7	depth too low			PRJNA807164	22
Microcebus murinus	Mmur_f371y18_jabe	Ambanjabe	-16.2901	46.7146	female	paired-end	4573556	3649136	2822573	78541	9.01048	34	9	depth too low			PRJNA807164	11
Microcebus murinus	Mmur_f18y12_ampi_S12	Ampijoroa	-16.3033	46.7946	female	single-end	5622386	5526761	4367806	68506	31.57	35	9	depth too low			PRJNA807164	SE 542
Microcebus murinus	Mmur_f72y18_mari	Mariarano	-15.5166	46.706	female	paired-end	8770636	8254512	5352734	78065	17.1978	26	10	M. ravelobensis			PRJNA807164	22
Microcebus murinus	Mmur_f56y13_ampi_S12	Ampijoroa	-16.3218	46.8069	female	single-end	4200038	4139316	2668579	63507	10.9446	22	12	locus not recovered			PRJNA807164	SE 542
Microcebus murinus	Mmur_m97y17_jabe	Ambanjabe	-16.3151	46.6976	male	paired-end	9565820	8415786	4921724	71348	17.3087	60	15	M. ravelobensis			PRJNA807164	5
Microcebus murinus	Mmur_m128y18_mari	Mariarano	-15.5166	46.7072	male	paired-end	6277804	5038940	3984376	88413	11.3017	73	19	M. ravelobensis	×	×	PRJNA807164	11
Microcebus murinus	Mmur_f14y12_ampi_S12	Ampijoroa	-16.3031	46.7964	female	single-end	5951836	5844254	3899319	64578	29.7973	724	193	M. murinus			PRJNA807164	SE 542
Microcebus murinus	Mmur_m57y12_ampi_S12	Ampijoroa	-16.324	46.7924	male	single-end	5705638	5618753	3744614	68121	27.3053	586	260	M. murinus			PRJNA807164	SE 542
Microcebus murinus	Mmur_m109y17_anko	Ankomakoma	-16.3432	46.7416	male	paired-end	6478662	5802712	4208437	72126	14.615	1360	343	M. murinus			PRJNA560399	4
Microcebus murinus	Mmur_m61y11_ampi_S12	Ampijoroa	-16.3185	46.8071	male	single-end	4235359	4180159	2849542	65956	21.5619	3986	1971	M. murinus			PRJNA807164	SE 542
Microcebus ravelobensis	Mrav_m26y14_mari_S12	Mariarano	-15.469	46.7047	male	single-end	1452556	1153524	723374	34756	9.9304	153	46	M. ravelobensis			PRJNA807164	SE 543
Microcebus ravelobensis	Mrav_f39y14_mari_S12	Mariarano	-15.4693	46.7052	female	single-end	2066294	1592802	1107708	46338	11.5081	290	64	M. ravelobensis			PRJNA807164	SE 543
Microcebus ravelobensis	Mrav_f97y14_mari_S12	Mariarano	-15.4812	46.6993	female	single-end	1031156	736517	478166	26058	8.79615	295	68	M. ravelobensis			PRJNA807164	SE 543
Microcebus ravelobensis	Mrav_m189y14_mari_S12	Mariarano	-15.508	46.7154	male	single-end	1857679	1460051	984827	42584	11.0617	284	103	M. ravelobensis			PRJNA807164	SE 543
Microcebus ravelobensis	Mrav_f98y14_mari_S12	Mariarano	-15.4857	46.6938	female	single-end	1713218	1333915	973484	42474	10.8432	325	104	M. ravelobensis			PRJNA807164	SE 543
Microcebus ravelobensis	Mrav_f173y14_mari_S12	Mariarano	-15.47	46.6916	female	single-end	1687565	1356430	888961	42742	9.82261	391	110	M. ravelobensis			PRJNA807164	SE 543
Microcebus ravelobensis	Mrav_m42y14_mari_S12	Mariarano	-15.4686	46.705	male	single-end	1479366	975783	637274	30990	9.7737	333	111	M. ravelobensis			PRJNA807164	SE 543
Microcebus ravelobensis	Mrav_f42y13_mari_S12	Mariarano	-15.4818	46.699	female	single-end	1482249	1040957	750008	36692	9.8349	435	114	M. ravelobensis	×		PRJNA807164	SE 543
Microcebus ravelobensis	Mrav_f9y14_mari_S12	Mariarano	-15.4686	46.7053	female	single-end	2202459	1597328	1114298	47644	11.1172	455	115	M. ravelobensis			PRJNA807164	SE 543
Microcebus ravelobensis	Mrav_m96y14_mari_S12	Mariarano	-15.481	46.6994	male	single-end	1491474	1204485	686582	34307	9.5175	285	128	M. ravelobensis			PRJNA807164	SE 543
Microcebus ravelobensis	Mrav_f168y14_mari_S12	Mariarano	-15.4719	46.7043	female	single-end	1696522	1177147	749653	36399	9.90318	476	138	M. ravelobensis			PRJNA807164	SE 543
Microcebus ravelobensis	Mrav_f06y14_mari_S12	Mariarano	-15.4713	46.7027	female	single-end	2097043	1595811	968322	42990	10.3255	592	150	M. ravelobensis	×		PRJNA807164	SE 543
Microcebus ravelobensis	Mrav_f67y12_ampi_S12	Ampijoroa	-16.3095	46.7948	female	single-end	6567191	5177046	4216685	64820	31.2686	404	155	M. ravelobensis			PRJNA807164	SE 543
Microcebus ravelobensis	Mrav_f181y14_mari_S12	Mariarano	-15.5048	46.7091	female	single-end	1720962	1290724	748534	39313	9.14308	419	174	M. ravelobensis			PRJNA807164	SE 543
Microcebus ravelobensis	Mrav_m01y13_mari_S12	Mariarano	-15.4731	46.6916	male	single-end	1428515	1075669	720303	39049	8.75874	668	202	M. ravelobensis			PRJNA807164	SE 543
Microcebus ravelobensis	Mrav_f65y14_mari_S12	Mariarano	-15.4702	46.691	female	single-end	1777277	1353785	905232	38548	11.2462	550	206	M. ravelobensis			PRJNA807164	SE 543
Microcebus ravelobensis	Mrav_m105y12_ampi_S12	Ampijoroa	-16.3097	46.7911	male	single-end	6985401	5548516	4531325	65552	33.3161	584	216	M. ravelobensis			PRJNA807164	SE 543
Microcebus ravelobensis	Mrav_m57y14_mari_S12	Mariarano	-15.4711	46.6964	male	single-end	2048146	1556992	1092899	47204	11.0921	569	217	M. ravelobensis			PRJNA807164	SE 543
Microcebus ravelobensis	Mrav_m88y12_ampi_S12	Ampijoroa	-16.3033	46.7976	male	single-end	5796810	4690034	3735137	62619	28.5735	481	221	M. ravelobensis			PRJNA807164	SE 543
Microcebus ravelobensis	Mrav_m55y13_mari_S12	Mariarano	-15.4857	46.6938	male	single-end	1724709	1319695	832818	40200	9.58905	634	237	M. ravelobensis			PRJNA807164	SE 543
Microcebus ravelobensis	Mrav_f11y12_ampi_S12	Ampijoroa	-16.3038	46.791	female	single-end	9128616	7199331	5827246	64848	43.2418	832	238	M. ravelobensis			PRJNA807164	SE 543
Microcebus ravelobensis	Mrav_m52y14_mari_S12	Mariarano	-15.4719	46.6953	male	single-end	1659477	1145758	781623	40361	9.3407	670	248	M. ravelobensis			PRJNA807164	SE 543
Microcebus ravelobensis	Mrav_m108y14_mari_S12	Mariarano	-15.4949	46.6986	male	single-end	1850928	1302412	836223	40631	9.85395	769	253	M. ravelobensis			PRJNA807164	SE 543
Microcebus ravelobensis	Mrav_f193y14_mari_S12	Mariarano	-15.4947	46.6981	female	single-end	2170304	1730028	895520	43889	9.70245	749	260	M. ravelobensis			PRJNA807164	SE 543
Microcebus ravelobensis	Mrav_f89y12_ampi_S12	Ampijoroa	-16.3036	46.7915	female	single-end	6260829	5013771	4070908	63943	30.7175	518	261	M. ravelobensis			PRJNA807164	SE 543
Microcebus ravelobensis	Mrav_m162y17_jabe_S2	Ambanjabe	-16.3268	46.6927	male	paired-end	3209148	2994424	2089061	72120	7.28024	1158	279	M. ravelobensis			PRJNA807164	21
Microcebus ravelobensis	Mrav_f81y12_ampi_S12	Ampijoroa	-16.3219	46.7931	female	single-end	6431442	5065705	3965255	64143	28.9858	1106	291	M. ravelobensis			PRJNA807164	SE 543
Microcebus ravelobensis	Mrav_f99y17_anko	Ankomakoma	-16.3299	46.7352	female	paired-end	3455678	2956674	2364369	69835	8.46926	1173	294	M. ravelobensis			PRJNA560399	4
Microcebus ravelobensis	Mrav_f125y13_mari_S12	Mariarano	-15.4949	46.6974	female	single-end	1483401	1178068	710128	37779	9.06009	858	294	M. ravelobensis			PRJNA807164	SE 543
Microcebus ravelobensis	Mrav_f80y17_rav	Ravelobe	-16.3115	46.8218	female	paired-end	4570176	4096348	2739467	70819	9.71088	1261	306	M. ravelobensis			PRJNA560399	4
Microcebus ravelobensis	Mrav_m56y17_rav	Ravelobe	-16.3071	46.8091	male	paired-end	5811554	5186520	3415828	71591	11.9753	1329	314	M. ravelobensis			PRJNA560399	4
Microcebus ravelobensis	Mrav_f169y17_anko	Ankomakoma	-16.3302	46.7351	female	paired-end	6707742	5792326	4321221	72674	14.925	1282	315	M. ravelobensis			PRJNA560399	4
Microcebus ravelobensis	Mrav_f50y17_jabe	Ambanjabe	-16.3288	46.7204	female	paired-end	2670078	2376024	1610330	65686	6.15393	1280	318	M. ravelobensis			PRJNA807164	5
Microcebus ravelobensis	Mrav_f148y17_jabe	Ambanjabe	-16.3258	46.6923	female	paired-end	3661470	3266968	2223264	70348	7.93556	1286	318	M. ravelobensis			PRJNA807164	5
Microcebus ravelobensis	Mrav_m44y12_ampi_S12	Ampijoroa	-16.3095	46.7942	male	single-end	7621834	5752218	4751456	61899	35.9857	817	318	M. ravelobensis			PRJNA807164	SE 543
Microcebus ravelobensis	Mrav_f112y12_ampi_S12	Ampijoroa	-16.3088	46.7937	female	single-end	4816084	3785270	2908758	60308	22.9761	611	320	M. ravelobensis			PRJNA807164	SE 543
Microcebus ravelobensis	Mrav_f08y17_mari	Mariarano	-15.4936	46.703	female	paired-end	3517058	3085672	2052824	69618	7.40383	1280	328	M. ravelobensis	×		PRJNA807164	5
Microcebus ravelobensis	Mrav_f54y17_mari	Mariarano	-15.4936	46.7043	female	paired-end	5099868	4737216	3266350	75223	10.8999	1354	338	M. ravelobensis			PRJNA807164	21
Microcebus ravelobensis	Mrav_f98y17_anko	Ankomakoma	-16.3332	46.7355	female	paired-end	3631366	3102392	2564948	73009	8.81887	1297	339	M. ravelobensis			PRJNA560399	4
Microcebus ravelobensis	Mrav_m173y17_jabe	Ambanjabe	-16.325	46.6919	male	paired-end	3865386	3440026	2363029	69768	8.50507	1332	340	M. ravelobensis			PRJNA807164	5
Microcebus ravelobensis	Mrav_f87y17_rav	Ravelobe	-16.308	46.8197	female	paired-end	3324066	2824258	2326953	71826	8.13491	1280	341	M. ravelobensis			PRJNA560399	4
Microcebus ravelobensis	Mrav_f229y14_mari_S12	Mariarano	-15.4722	46.7023	female	single-end	2070120	1309885	834763	41440	9.45022	981	342	M. ravelobensis			PRJNA807164	SE 543
Microcebus ravelobensis	Mrav_f90y17_mari	Mariarano	-15.4936	46.7028	female	paired-end	5646568	4956506	2996740	71439	10.5134	1356	344	M. ravelobensis			PRJNA807164	5
Microcebus ravelobensis	Mrav_f365y18_jabe	Ambanjabe	-16.2831	46.6992	female	paired-end	5819430	5521446	3670644	76227	12.086	1386	344	M. ravelobensis			PRJNA807164	22
Microcebus ravelobensis	Mrav_m60y17_rav	Ravelobe	-16.3089	46.8242	male	paired-end	6448470	5760682	3852831	71484	13.5318	1391	344	M. ravelobensis			PRJNA560399	4
Microcebus ravelobensis	Mrav_f21y17_rav	Ravelobe	-16.3021	46.8199	female	paired-end	4755926	4236876	2909400	70783	10.2964	1354	346	M. ravelobensis			PRJNA560399	4
Microcebus ravelobensis	Mrav_23y04_rano	Andoharano	-16.2853	47.0072	female	paired-end	3136794	2921010	2052546	71395	7.21032	1361	349	M. ravelobensis			PRJNA807164	21
Microcebus ravelobensis	Mrav_m55y17_rav	Ravelobe	-16.307	46.8072	male	paired-end	6788952	6056104	3988274	71875	13.925	1394	349	M. ravelobensis			PRJNA560399	4
Microcebus ravelobensis	Mrav_m158y17_anko	Ankomakoma	-16.3479	46.7313	male	paired-end	6083516	5235288	3928112	73033	13.4875	1399	351	M. ravelobensis			PRJNA560399	4
Microcebus ravelobensis	Mrav_f44y18_mari	Mariarano	-15.5236	46.7277	female	paired-end	6627736	6243840	4113829	78489	13.1753	1404	355	M. ravelobensis			PRJNA807164	22
Microcebus ravelobensis	Mrav_m176y17_jabe	Ambanjabe	-16.3259	46.6923	male	paired-end	3172584	2832504	1956834	66019	7.42959	1398	356	M. ravelobensis			PRJNA807164	5
Microcebus ravelobensis	Mrav_m107y17_mari	Mariarano	-15.4802	46.6373	male	paired-end	6210218	5773658	4004662	76653	13.1311	1416	357	M. ravelobensis			PRJNA807164	21
Microcebus ravelobensis	Mrav_f88y17_rav	Ravelobe	-16.3119	46.8233	female	paired-end	4374028	3650994	2990103	73950	10.1493	1451	358	M. ravelobensis			PRJNA560399	4
Microcebus ravelobensis	Mrav_m145y18_mari	Mariarano	-15.5021	46.724	male	paired-end	4107716	3282236	2631075	76015	8.68567	1431	362	M. ravelobensis			PRJNA807164	11
Microcebus ravelobensis	Mrav_m34y17_mari	Mariarano	-15.4948	46.6974	male	paired-end	4626016	4114902	2795955	70307	9.96063	1481	362	M. ravelobensis			PRJNA807164	5
Microcebus ravelobensis	Mrav_m366y18_jabe	Ambanjabe	-16.2879	46.7185	male	paired-end	5412444	5114654	3465528	75923	11.4736	1426	363	M. ravelobensis			PRJNA807164	22
Microcebus ravelobensis	Mrav_m281y18_mari	Mariarano	-15.4729	46.6912	male	paired-end	7731860	7265212	4795455	77481	15.5487	1482	364	M. ravelobensis			PRJNA807164	22
Microcebus ravelobensis	Mrav_m159y17_anko	Ankomakoma	-16.3479	46.7308	male	paired-end	7075996	6099480	4578005	73243	15.6714	1441	364	M. ravelobensis			PRJNA560399	4
Microcebus ravelobensis	Mrav_m135y17_anko	Ankomakoma	-16.3357	46.7373	male	paired-end	8369808	7217116	5383679	73970	18.2548	1466	365	M. ravelobensis			PRJNA560399	4
Microcebus ravelobensis	Mrav_m271y18_mari	Mariarano	-15.4694	46.6989	male	paired-end	6292134	5929630	3962684	76819	12.9547	1469	366	M. ravelobensis			PRJNA807164	22
Microcebus ravelobensis	Mrav_f83y17_rav	Ravelobe	-16.309	46.8202	female	paired-end	7159666	6401434	4182071	71828	14.6104	1426	366	M. ravelobensis			PRJNA560399	4
Microcebus ravelobensis	Mrav_f162y17_anko	Ankomakoma	-16.3475	46.7289	female	paired-end	4170652	3560180	2770787	71103	9.78226	1473	367	M. ravelobensis			PRJNA807164	4
Microcebus ravelobensis	Mrav_f75y17_mari	Mariarano	-15.4943	46.6992	female	paired-end	4296558	3755646	2478953	69571	8.94637	1460	368	M. ravelobensis			PRJNA807164	5
Microcebus ravelobensis	Mrav_f236y18_mari	Mariarano	-15.4722	46.6948	female	paired-end	7595042	7169022	4684637	78342	15.0126	1465	369	M. ravelobensis			PRJNA807164	22
Microcebus ravelobensis	Mrav_f112y17_jabe	Ambanjabe	-16.3174	46.6964	female	paired-end	4390812	3910606	2638489	70105	9.43712	1430	370	M. ravelobensis			PRJNA807164	5
Microcebus ravelobensis	Mrav_f170y18_mari	Mariarano	-15.5062	46.6942	female	paired-end	6486124	6078810	3954264	77609	12.8036	1498	370	M. ravelobensis			PRJNA807164	22
Microcebus ravelobensis	Mrav_f273y18_mari	Mariarano	-15.4695	46.6988	female	paired-end	7800480	7349426	4804168	78207	15.4358	1483	370	M. ravelobensis			PRJNA807164	22
Microcebus ravelobensis	Mrav_m57y17_rav_S2	Ravelobe	-16.3121	46.8232	male	paired-end	8282078	7747104	4950320	77384	16.0747	1504	370	M. ravelobensis			PRJNA807164	21
Microcebus ravelobensis	Mrav_32y04_rano	Andoharano	-16.286	47.0051	female	paired-end	5132740	4796322	3341494	74235	11.3111	1524	371	M. ravelobensis			PRJNA807164	21
Microcebus ravelobensis	Mrav_m62y18_mari	Mariarano	-15.5057	46.7249	male	paired-end	6663436	6205256	4338990	75963	14.34	1442	371	M. ravelobensis			PRJNA807164	21
Microcebus ravelobensis	Mrav_m95y17_rav_S2	Ravelobe	-16.3081	46.8057	male	paired-end	5410874	5036146	3593641	75059	12.0006	1455	372	M. ravelobensis			PRJNA807164	21
Microcebus ravelobensis	Mrav_m174y17_jabe	Ambanjabe	-16.3273	46.6929	male	paired-end	7778036	6913082	4521092	72546	15.6489	1462	372	M. ravelobensis			PRJNA807164	5
Microcebus ravelobensis	Mrav_f07y17_mari	Mariarano	-15.4935	46.7026	female	paired-end	8252902	7784458	4983055	79142	15.8335	1525	372	M. ravelobensis			PRJNA807164	22
Microcebus ravelobensis	Mrav_f137y18_mari	Mariarano	-15.5235	46.7278	female	paired-end	6407944	6037444	3991298	75554	13.2664	1470	374	M. ravelobensis			PRJNA807164	22
Microcebus ravelobensis	Mrav_m90y17_rav_S2	Ravelobe	-16.3111	46.823	male	paired-end	7699750	7243386	5134760	77214	16.7202	1482	374	M. ravelobensis		×	PRJNA807164	21
Microcebus ravelobensis	Mrav_m30y12_ampi_S12	Ampijoroa	-16.3213	46.7934	male	single-end	5310790	4214830	3453678	62289	26.5797	1015	374	M. ravelobensis			PRJNA807164	SE 543
Microcebus ravelobensis	Mrav_m109y17_jabe	Ambanjabe	-16.3175	46.696	male	paired-end	7255462	6353548	3828664	71986	13.36	1509	375	M. ravelobensis			PRJNA807164	5
Microcebus ravelobensis	Mrav_f149y18_mari	Ambanjabe	-15.5032	46.7243	female	paired-end	6316726	5867980	4089907	75107	13.6612	1530	375	M. ravelobensis			PRJNA807164	21
Microcebus ravelobensis	Mrav_m67y17_jabe	Ambanjabe	-16.3291	46.7213	male	paired-end	7065678	6241826	3781003	71835	13.2302	1491	376	M. ravelobensis			PRJNA807164	5
Microcebus ravelobensis	Mrav_f20y17_rav	Ravelobe	-16.3008	46.8217	female	paired-end	7916830	7114902	4562604	72304	15.8352	1492	376	M. ravelobensis			PRJNA560399	4
Microcebus ravelobensis	Mrav_f10y18_mari	Mariarano	-15.5088	46.7257	female	paired-end	6908730	6524514	4363980	75783	14.4592	1558	377	M. ravelobensis			PRJNA807164	22
Microcebus ravelobensis	Mrav_m230y18_mari	Mariarano	-15.4729	46.6912	male	paired-end	8767880	8237352	5390384	80116	16.9046	1519	377	M. ravelobensis			PRJNA807164	22
Microcebus ravelobensis	Mrav_m132y13_mari_S12	Mariarano	-15.4949	46.6986	male	single-end	1475312	1103369	756647	39458	9.159	1083	378	M. ravelobensis			PRJNA807164	SE 543
Microcebus ravelobensis	Mrav_f41y17_rav	Ravelobe	-16.3148	46.8228	female	paired-end	8838044	7889072	5061542	72327	17.5664	1507	379	M. ravelobensis		×	PRJNA560399	4
Microcebus ravelobensis	Mrav_26y04_rano	Andoharano	-16.2849	47.0082	female	paired-end	4245514	3962194	2817703	73674	9.60537	1557	380	M. ravelobensis			PRJNA807164	21
Microcebus ravelobensis	Mrav_f101y18_mari	Mariarano	-15.5276	46.7068	female	paired-end	5287432	3901518	3044604	75604	10.1023	1527	380	M. ravelobensis			PRJNA807164	11
Microcebus ravelobensis	Mrav_f265y18_mari	Mariarano	-15.4695	46.6988	female	paired-end	8403172	7933044	5269869	78346	16.9182	1606	380	M. ravelobensis			PRJNA807164	22
Microcebus ravelobensis	Mrav_f24y18_mari	Mariarano	-15.5057	46.7249	female	paired-end	4114716	3279070	2605493	76228	8.5828	1521	381	M. ravelobensis			PRJNA807164	11
Microcebus ravelobensis	Mrav_f232y18_mari	Mariarano	-15.4731	46.692	female	paired-end	7207068	6780200	4429042	77364	14.3762	1499	381	M. ravelobensis			PRJNA807164	22
Microcebus ravelobensis	Mrav_m19y17_rav	Ravelobe	-16.3075	46.8066	male	paired-end	9080558	8126294	5261465	72590	18.1961	1514	381	M. ravelobensis			PRJNA560399	4
Microcebus ravelobensis	Mrav_m352y18_mari	Mariarano	-15.3621	46.7444	male	paired-end	6906412	6450132	4494223	76760	14.6949	1551	384	M. ravelobensis			PRJNA807164	21
Microcebus ravelobensis	Mrav_m55y17_jabe	Ambanjabe	-16.3277	46.7171	male	paired-end	6020786	5379672	3603219	71844	12.5876	1504	385	M. ravelobensis			PRJNA807164	5
Microcebus ravelobensis	Mrav_f233y18_mari	Mariarano	-15.4732	46.6922	female	paired-end	7947038	7463250	4870000	79525	15.4016	1529	385	M. ravelobensis			PRJNA807164	22
Microcebus ravelobensis	Mrav_f235y18_mari	Mariarano	-15.472	46.6951	female	paired-end	8144824	7666002	5003563	78768	15.9653	1525	385	M. ravelobensis			PRJNA807164	22
Microcebus ravelobensis	Mrav_m101y12_ampi_S12	Ampijoroa	-16.3086	46.7968	male	single-end	4611390	3571203	2921756	59561	23.5657	897	385	M. ravelobensis			PRJNA807164	SE 543
Microcebus ravelobensis	Mrav_f279y18_mari	Mariarano	-15.4729	46.6926	female	paired-end	6602464	6218960	4089456	77473	13.2555	1521	386	M. ravelobensis			PRJNA807164	22
Microcebus ravelobensis	Mrav_f165y17_anko	Ankomakoma	-16.3335	46.7355	female	paired-end	6615888	5659788	4230819	72805	14.583	1553	386	M. ravelobensis			PRJNA560399	4
Microcebus ravelobensis	Mrav_f30y17_rav	Ravelobe	-16.3025	46.8154	female	paired-end	8129904	7267792	4655434	72360	16.1436	1508	386	M. ravelobensis			PRJNA560399	4
Microcebus ravelobensis	Mrav_f80y17_jabe	Ambanjabe	-16.3294	46.7221	female	paired-end	6032718	5317908	3238867	72082	11.2861	1539	387	M. ravelobensis			PRJNA807164	5
Microcebus ravelobensis	Mrav_m70y17_mari	Mariarano	-15.4931	46.7008	male	paired-end	7151608	6341096	4289259	71833	14.9854	1513	388	M. ravelobensis			PRJNA807164	5
Microcebus ravelobensis	Mrav_f139y18_mari	Mariarano	-15.5097	46.726	female	paired-end	7929786	7489226	4919603	77721	15.9089	1565	388	M. ravelobensis			PRJNA807164	22
Microcebus ravelobensis	Mrav_m146y18_mari_S2	Mariarano	-15.5051	46.7248	male	paired-end	8478212	7940648	5492073	76803	17.9426	1546	388	M. ravelobensis			PRJNA807164	21
Microcebus ravelobensis	Mrav_m159y17_jabe	Ambanjabe	-16.3275	46.693	male	paired-end	5998064	5356128	3645698	70826	12.9205	1560	389	M. ravelobensis			PRJNA807164	5
Microcebus ravelobensis	Mrav_f166y17_anko	Ankomakoma	-16.3327	46.7354	female	paired-end	6677350	5743140	4274247	72734	14.7574	1566	390	M. ravelobensis			PRJNA560399	4
Microcebus ravelobensis	Mrav_25y04_rano	Andoharano	-16.2849	47.0082	female	paired-end	3561976	3285198	2179068	71247	7.68063	1542	391	M. ravelobensis			PRJNA807164	21
Microcebus ravelobensis	Mrav_f252y18_mari	Mariarano	-15.4719	46.6953	female	paired-end	8161910	7713002	5032340	78979	16.0133	1565	391	M. ravelobensis		×	PRJNA807164	22
Microcebus ravelobensis	Mrav_m114y17_mari_S2	Mariarano	-15.4651	46.63	male	paired-end	8020452	7422608	5118462	77198	16.6456	1531	393	M. ravelobensis			PRJNA807164	21
Microcebus ravelobensis	Mrav_m91y17_jabe	Ambanjabe	-16.3287	46.7199	male	paired-end	6450762	5690756	3450938	70842	12.2355	1541	394	M. ravelobensis			PRJNA807164	5
Microcebus ravelobensis	Mrav_m59y17_mari	Mariarano	-15.4936	46.7031	male	paired-end	5550560	4687226	3401779	71088	12.0183	1570	395	M. ravelobensis			PRJNA807164	5
Microcebus ravelobensis	Mrav_m162y17_mari	Mariarano	-15.481	46.6358	male	paired-end	5841046	5414552	3753901	75746	12.4475	1560	396	M. ravelobensis			PRJNA807164	21
Microcebus ravelobensis	Mrav_f126y17_anko	Ankomakoma	-16.3481	46.7322	female	paired-end	6080474	5208624	3927552	72900	13.5009	1588	396	M. ravelobensis			PRJNA560399	4
Microcebus ravelobensis	Mrav_f296y18_mari_S2	Mariarano	-15.3828	46.7828	female	paired-end	8816196	8303332	5679295	78862	18.0877	1598	396	M. ravelobensis			PRJNA807164	21
Microcebus ravelobensis	Mrav_m09y13_mari_S12	Mariarano	-15.4713	46.6961	male	single-end	2348418	1238925	901534	43478	9.75139	1032	398	M. ravelobensis			PRJNA807164	SE 543
Microcebus ravelobensis	Mrav_m93y17_jabe	Ambanjabe	-16.3283	46.7187	male	paired-end	6394864	5674302	3473623	71033	12.2756	1580	399	M. ravelobensis			PRJNA807164	5
Microcebus ravelobensis	Mrav_m82y17_jabe	Ambanjabe	-16.3306	46.7252	male	paired-end	8495108	7494976	4463288	72364	15.4789	1595	399	M. ravelobensis		×	PRJNA807164	5
Microcebus ravelobensis	Mrav_m127y17_anko	Ankomakoma	-16.3482	46.7324	male	paired-end	9101158	7777626	5796589	73202	19.8739	1608	399	M. ravelobensis			PRJNA560399	4
Microcebus ravelobensis	Mrav_f63y18_mari	Mariarano	-15.503	46.7243	female	paired-end	10601956	10021694	6547800	80235	20.4917	1564	399	M. ravelobensis		×	PRJNA807164	22
Microcebus ravelobensis	Mrav_m100y17_jabe	Ambanjabe	-16.3177	46.6963	male	paired-end	9931730	8859532	5778604	73197	19.8208	1556	400	M. ravelobensis			PRJNA807164	5
Microcebus ravelobensis	Mrav_m33y17_rav	Ravelobe	-16.2959	46.8164	male	paired-end	6138472	5707714	3993087	75724	13.2453	1639	401	M. ravelobensis			PRJNA807164	21
Microcebus ravelobensis	Mrav_f40y18_mari	Mariarano	-15.5091	46.7258	female	paired-end	7528774	7099736	4654086	76417	15.3097	1571	401	M. ravelobensis			PRJNA807164	22
Microcebus ravelobensis	Mrav_m18y17_rav_S2	Ravelobe	-16.3089	46.8042	male	paired-end	7564682	7057800	4852007	77176	15.8257	1572	402	M. ravelobensis			PRJNA807164	21
Microcebus ravelobensis	Mrav_m107y17_jabe	Ambanjabe	-16.3177	46.6963	male	paired-end	9554214	8479530	5550184	72857	19.1248	1610	402	M. ravelobensis			PRJNA807164	5
Microcebus ravelobensis	Mrav_f41y18_mari	Mariarano	-15.5089	46.7257	female	paired-end	8453336	7987236	5254552	79062	16.72	1614	403	M. ravelobensis			PRJNA807164	22
Microcebus ravelobensis	Mrav_m161y17_anko	Ankomakoma	-16.3476	46.729	male	paired-end	8070478	6950858	5209663	73362	17.8124	1644	403	M. ravelobensis			PRJNA560399	4
Microcebus ravelobensis	Mrav_m355y18_mari	Mariarano	-15.3757	46.7408	male	paired-end	6345966	5889882	4135456	76027	13.6636	1611	404	M. ravelobensis			PRJNA807164	21
Microcebus ravelobensis	Mrav_m09y18_mari	Mariarano	-15.5083	46.7256	male	paired-end	7119614	6665806	4706548	76025	15.5476	1638	404	M. ravelobensis			PRJNA807164	21
Microcebus ravelobensis	Mrav_f257y18_mari	Mariarano	-15.4715	46.696	female	paired-end	8907326	8377608	5444538	80450	17.0314	1597	405	M. ravelobensis		×	PRJNA807164	22
Microcebus ravelobensis	Mrav_f25y17_rav	Ravelobe	-16.3013	46.8188	female	paired-end	9527570	8502954	5431625	72479	18.8332	1588	405	M. ravelobensis		×	PRJNA560399	4
Microcebus ravelobensis	Mrav_m295y18_mari	Mariarano	-15.3824	46.7825	male	paired-end	6148606	5718424	3991153	75614	13.2717	1625	406	M. ravelobensis			PRJNA807164	21
Microcebus ravelobensis	Mrav_m346y18_mari	Mariarano	-15.3794	46.7533	male	paired-end	6430372	5985216	4225184	76914	13.8183	1603	406	M. ravelobensis			PRJNA807164	21
Microcebus ravelobensis	Mrav_m68y17_rav	Ravelobe	-16.3017	46.8207	male	paired-end	6804362	6090988	4049401	71170	14.2763	1623	406	M. ravelobensis			PRJNA560399	4
Microcebus ravelobensis	Mrav_m351y18_mari	Mariarano	-15.3746	46.7399	male	paired-end	7388180	6902866	4786094	76548	15.7155	1618	406	M. ravelobensis			PRJNA807164	21
Microcebus ravelobensis	Mrav_m42y17_rav	Ravelobe	-16.3087	46.8198	male	paired-end	4590576	3890976	3181120	74816	10.6837	1641	407	M. ravelobensis			PRJNA560399	4
Microcebus ravelobensis	Mrav_m116y17_jabe	Ambanjabe	-16.3063	46.6974	male	paired-end	5900164	5528686	3593024	75954	11.8744	1623	407	M. ravelobensis			PRJNA807164	22
Microcebus ravelobensis	Mrav_f157y17_anko	Ankomakoma	-16.3487	46.7345	female	paired-end	5382344	4472444	3457140	72238	12.0024	1615	407	M. ravelobensis			PRJNA560399	4
Microcebus ravelobensis	Mrav_m54y17_jabe	Ambanjabe	-16.3282	46.7183	male	paired-end	8760470	7762086	4665504	72816	16.0738	1612	408	M. ravelobensis		×	PRJNA807164	5
Microcebus ravelobensis	Mrav_f315y18_mari	Mariarano	-15.3806	46.781	female	paired-end	8961154	8425808	5485205	79991	17.2437	1636	408	M. ravelobensis		×	PRJNA807164	22
Microcebus ravelobensis	Mrav_f07y18_mari	Mariarano	-15.5064	46.7251	female	paired-end	4539262	3631086	2873306	76023	9.4813	1675	409	M. ravelobensis			PRJNA807164	11
Microcebus ravelobensis	Mrav_f20y18_mari	Mariarano	-15.5016	46.7239	female	paired-end	4643702	3704614	2938559	76071	9.68251	1641	409	M. ravelobensis			PRJNA807164	11
Microcebus ravelobensis	Mrav_f157y17_jabe	Ambanjabe	-16.3264	46.6925	female	paired-end	6219414	5815160	3710624	77385	12.0606	1635	409	M. ravelobensis			PRJNA807164	22
Microcebus ravelobensis	Mrav_f91y18_mari	Mariarano	-15.5109	46.7018	female	paired-end	10521590	9839928	6643989	80039	20.8671	1676	409	M. ravelobensis			PRJNA807164	21
Microcebus ravelobensis	Mrav_f261y18_mari	Mariarano	-15.4693	46.699	female	paired-end	8693352	8160048	5232400	79270	16.6041	1685	410	M. ravelobensis			PRJNA807164	22
Microcebus ravelobensis	Mrav_f132y17_anko	Ankomakoma	-16.3484	46.7339	female	paired-end	7745228	6611808	4960627	72785	17.0835	1647	412	M. ravelobensis		×	PRJNA560399	4
Microcebus ravelobensis	Mrav_m179y17_jabe	Ambanjabe	-16.334	46.7069	male	paired-end	4748158	4442500	2917676	74440	9.85332	1657	415	M. ravelobensis			PRJNA807164	22
Microcebus ravelobensis	Mrav_m69y17_mari	Mariarano	-15.4932	46.7008	male	paired-end	7035694	5971156	4258134	71904	14.8663	1654	416	M. ravelobensis			PRJNA807164	5
Microcebus ravelobensis	Mrav_m101y17_anko	Ankomakoma	-16.3437	46.7373	male	paired-end	7184876	6184158	4706128	74045	15.953	1634	417	M. ravelobensis			PRJNA560399	4
Microcebus ravelobensis	Mrav_m266y18_mari	Mariarano	-15.4693	46.6989	male	paired-end	9053600	8516224	5586332	79988	17.5831	1711	417	M. ravelobensis			PRJNA807164	22
Microcebus ravelobensis	Mrav_f31y12_ampi_S12	Ampijoroa	-16.3196	46.7945	female	single-end	8956488	7284760	5694290	65310	41.9202	1074	417	M. ravelobensis			PRJNA807164	SE 543
Microcebus ravelobensis	Mrav_f101y17_mari_S2	Mariarano	-15.4727	46.6343	female	paired-end	7756028	7241962	4989813	77423	16.1718	1681	418	M. ravelobensis			PRJNA807164	21
Microcebus ravelobensis	Mrav_m347y18_mari	Mariarano	-15.3795	46.7534	male	paired-end	4541002	3637712	2935036	75952	9.6862	1677	420	M. ravelobensis			PRJNA807164	11
Microcebus ravelobensis	Mrav_f19y13_mari_S12	Mariarano	-15.473	46.6914	female	single-end	2010309	1626868	1065472	44282	11.4928	1057	420	M. ravelobensis			PRJNA807164	SE 543
Microcebus ravelobensis	Mrav_f141y18_mari	Mariarano	-15.5063	46.725	female	paired-end	8159624	7583184	5313116	78511	17.0136	1653	420	M. ravelobensis			PRJNA807164	21
Microcebus ravelobensis	Mrav_f325y18_mari	Mariarano	-15.3874	46.7867	female	paired-end	9232252	8655014	5876818	78602	18.7776	1679	421	M. ravelobensis		×	PRJNA807164	21
Microcebus ravelobensis	Mrav_m52y17_rav	Ravelobe	-16.3092	46.8239	male	paired-end	5033296	4056328	2899909	71859	10.1192	1674	424	M. ravelobensis			PRJNA560399	4
Microcebus ravelobensis	Mrav_f105y17_jabe	Ambanjabe	-16.3064	46.6973	female	paired-end	8516022	7992378	5064487	79255	16.0811	1680	425	M. ravelobensis			PRJNA807164	22
Microcebus ravelobensis	Mrav_m245y18_mari	Mariarano	-15.4715	46.696	male	paired-end	9994550	9348482	6076004	80176	19.0378	1709	425	M. ravelobensis			PRJNA807164	22
Microcebus ravelobensis	Mrav_m166y17_jabe	Ambanjabe	-16.3288	46.6965	male	paired-end	6268976	5860768	3814642	77058	12.4264	1674	426	M. ravelobensis			PRJNA807164	22
Microcebus ravelobensis	Mrav_m342y18_mari	Mariarano	-15.3794	46.7532	male	paired-end	8210040	7701208	5330092	77474	17.2649	1738	426	M. ravelobensis		×	PRJNA807164	21
Microcebus ravelobensis	Mrav_f171y18_mari	Mariarano	-15.5061	46.6941	female	paired-end	8971258	8363526	5715372	79790	18.0042	1724	426	M. ravelobensis			PRJNA807164	21
Microcebus ravelobensis	Mrav_f20y13_mari_S12	Mariarano	-15.4731	46.692	female	single-end	2008195	1549899	940083	44198	10.0503	942	427	M. ravelobensis			PRJNA807164	SE 543
Microcebus ravelobensis	Mrav_m119y17_jabe	Ambanjabe	-16.3067	46.6971	male	paired-end	8769716	8224120	5358323	79521	16.9513	1737	429	M. ravelobensis			PRJNA807164	22
Microcebus ravelobensis	Mrav_f66y17_rave	Ravelobe	-16.3007	46.8219	female	paired-end	4841382	3299708	2383162	70120	8.53185	1650	432	M. ravelobensis			PRJNA807164	4
Microcebus ravelobensis	Mrav_f149y17_jabe	Ambanjabe	-16.3272	46.6929	female	paired-end	6935238	6489644	4160324	77907	13.427	1711	432	M. ravelobensis			PRJNA807164	22
Microcebus ravelobensis	Mrav_m180y18_mari	Mariarano	-15.5045	46.6965	male	paired-end	11489030	10749942	6954979	82324	21.2644	1791	432	M. ravelobensis			PRJNA807164	22
Microcebus ravelobensis	Mrav_f86y18_mari	Mariarano	-15.5142	46.7353	female	paired-end	7711558	7253786	4739730	78086	15.2585	1717	433	M. ravelobensis			PRJNA807164	22
Microcebus ravelobensis	Mrav_f188y18_mari_S2	Mariarano	-15.5079	46.6895	female	paired-end	10234980	9594234	6570151	79458	20.7768	1756	433	M. ravelobensis			PRJNA807164	21
Microcebus ravelobensis	Mrav_m272y18_mari	Mariarano	-15.4716	46.6958	male	paired-end	8150448	7697088	5063601	78485	16.2202	1736	435	M. ravelobensis		×	PRJNA807164	22
Microcebus ravelobensis	Mrav_m264y18_mari	Mariarano	-15.4697	46.6986	male	paired-end	8673500	8129312	5330949	79105	16.9428	1839	435	M. ravelobensis			PRJNA807164	22
Microcebus ravelobensis	Mrav_f201y18_mari_S2	Mariarano	-15.5087	46.7256	female	paired-end	8674808	8050196	5493935	78188	17.6562	1702	435	M. ravelobensis			PRJNA807164	21
Microcebus ravelobensis	Mrav_f104y17_mari	Mariarano	-15.4725	46.634	female	paired-end	5600898	4506262	3562768	83072	10.7805	1770	436	M. ravelobensis			PRJNA807164	11
Microcebus ravelobensis	Mrav_m109y17_mari	Mariarano	-15.4803	46.6371	male	paired-end	6208598	5775506	4039025	75592	13.4229	1770	437	M. ravelobensis			PRJNA807164	21
Microcebus ravelobensis	Mrav_f94y18_mari_S2	Mariarano	-15.5103	46.7012	female	paired-end	11933580	11182706	7522801	80454	23.4865	1735	438	M. ravelobensis			PRJNA807164	21
Microcebus ravelobensis	Mrav_m356y18_mari	Mariarano	-15.3756	46.7407	male	paired-end	9157078	8650152	5788195	79807	18.2302	1747	440	M. ravelobensis			PRJNA807164	22
Microcebus ravelobensis	Mrav_m141y17_anko	Ankomakoma	-16.33	46.7351	male	paired-end	8400792	7212538	5396260	73336	18.4601	1711	441	M. ravelobensis			PRJNA560399	4
Microcebus ravelobensis	Mrav_m103y17_mari	Mariarano	-15.4726	46.6341	male	paired-end	6778286	6336788	4441970	78032	14.3142	1795	442	M. ravelobensis			PRJNA807164	21
Microcebus ravelobensis	Mrav_m72y17_mari	Mariarano	-15.4946	46.6981	male	paired-end	9385990	8679642	5655034	77285	18.3689	1873	442	M. ravelobensis			PRJNA807164	21
Microcebus ravelobensis	Mrav_m319y18_mari	Mariarano	-15.3856	46.7851	male	paired-end	4666648	3740162	3043229	74988	10.1809	1774	443	M. ravelobensis			PRJNA807164	11
Microcebus ravelobensis	Mrav_f84y18_mari	Mariarano	-15.5145	46.7348	female	paired-end	7866584	7385650	4796031	77701	15.4993	1733	445	M. ravelobensis			PRJNA807164	22
Microcebus ravelobensis	Mrav_f294y18_mari	Mariarano	-15.3821	46.7823	female	paired-end	10376826	9725554	6625560	79606	20.903	1817	445	M. ravelobensis		×	PRJNA807164	21
Microcebus ravelobensis	Mrav_f197y17_jabe	Ambanjabe	-16.3211	46.7208	female	paired-end	7128068	6583092	4204598	76263	13.8528	1789	446	M. ravelobensis			PRJNA807164	21
Microcebus ravelobensis	Mrav_169y03_bero	Beronono	-15.995	47.1544	male	paired-end	9949422	9233038	5989936	78579	19.1553	1820	446	M. ravelobensis			PRJNA807164	21
Microcebus ravelobensis	Mrav_m73y17_mari	Mariarano	-15.4948	46.6973	male	paired-end	5834742	4929322	3550763	71146	12.5089	1856	449	M. ravelobensis			PRJNA807164	5
Microcebus ravelobensis	Mrav_f46y17_mari	Mariarano	-15.4939	46.6999	female	paired-end	10143048	9511966	6055055	80694	18.8574	1834	449	M. ravelobensis			PRJNA807164	22
Microcebus ravelobensis	Mrav_m73y17_rav_S2	Ravelobe	-16.3152	46.8229	male	paired-end	8058036	7480534	4975712	86397	14.4544	1823	450	M. ravelobensis	×	×	PRJNA807164	21
Microcebus ravelobensis	Mrav_38y03_anko	Ankoririka	-16.2727	47.0486	female	paired-end	7355344	6847438	4485966	76381	14.7693	1803	450	M. ravelobensis			PRJNA807164	21
Microcebus ravelobensis	Mrav_f81y18_mari	Mariarano	-15.5146	46.7347	female	paired-end	8509306	8013008	5198033	78519	16.6159	1773	450	M. ravelobensis			PRJNA807164	22
Microcebus ravelobensis	Mrav_m124y18_mari	Mariarano	-15.523	46.7074	male	paired-end	11645868	10934742	7430052	80259	23.25	1768	450	M. ravelobensis			PRJNA807164	21
Microcebus ravelobensis	Mrav_m117y17_jabe	Ambanjabe	-16.3066	46.6972	male	paired-end	9043850	8473556	5549542	80531	17.3203	1824	454	M. ravelobensis			PRJNA807164	22
Microcebus ravelobensis	Mrav_f22y17_rav	Ravelobe	-16.3016	46.8198	female	paired-end	5558098	4720748	3699433	74920	12.4069	1788	456	M. ravelobensis			PRJNA560399	4
Microcebus ravelobensis	Mrav_167y03_bero	Beronono	-15.9947	47.154	female	paired-end	9003616	8364048	5374008	77489	17.4293	1833	456	M. ravelobensis			PRJNA807164	21
Microcebus ravelobensis	Mrav_138y03_anko	Beronono	-15.9961	47.1563	female	paired-end	10691144	9942514	6300939	78595	20.137	1874	457	M. ravelobensis			PRJNA807164	21
Microcebus ravelobensis	Mrav_m227y14_mari_S12	Mariarano	-15.4657	46.6945	male	single-end	2031521	1636461	973349	44619	10.4052	1135	459	M. ravelobensis			PRJNA807164	SE 543
Microcebus ravelobensis	Mrav_166y03_bero	Beronono	-15.9951	47.1495	female	paired-end	10626900	9836926	6290798	78514	20.1184	1830	459	M. ravelobensis			PRJNA807164	21
Microcebus ravelobensis	Mrav_m79y17_rav	Ravelobe	-16.3127	46.8216	male	paired-end	6891944	5860866	4746103	75569	15.7631	1750	460	M. ravelobensis			PRJNA560399	4
Microcebus ravelobensis	Mrav_m55y17_mari	Mariarano	-15.4937	46.7038	male	paired-end	9527754	8821398	5680167	78405	18.2005	1784	460	M. ravelobensis			PRJNA807164	21
Microcebus ravelobensis	Mrav_f321y18_mari	Mariarano	-15.3857	46.7852	female	paired-end	14833892	13937014	9190962	84908	27.2002	1830	460	M. ravelobensis		×	PRJNA807164	21
Microcebus ravelobensis	Mrav_f11y18_mari	Mariarano	-15.5089	46.7257	female	paired-end	13544440	12809706	8246554	84026	24.6475	1825	461	M. ravelobensis		×	PRJNA807164	22
Microcebus ravelobensis	Mrav_m320y18_mari	Mariarano	-15.3857	46.7852	male	paired-end	8895052	8277332	5426613	78095	17.4698	1827	462	M. ravelobensis			PRJNA807164	21
Microcebus ravelobensis	Mrav_m25y18_mari	Mariarano	-15.5026	46.7242	male	paired-end	10660358	10085936	6768055	80933	21.0066	1957	462	M. ravelobensis			PRJNA807164	22
Microcebus ravelobensis	Mrav_f280y18_mari	Mariarano	-15.473	46.6925	female	paired-end	9075554	8518994	5456111	78881	17.3878	1839	463	M. ravelobensis			PRJNA807164	22
Microcebus ravelobensis	Mrav_m202y17_jabe	Ambanjabe	-16.321	46.7206	male	paired-end	9097118	8388516	5443371	77675	17.6138	1852	463	M. ravelobensis		×	PRJNA807164	21
Microcebus ravelobensis	Mrav_24y04_rano	Andoharano	-16.2857	47.0063	male	paired-end	8206830	7614088	5010027	76096	16.5402	1870	467	M. ravelobensis			PRJNA807164	21
Microcebus ravelobensis	Mrav_f62y17_rav	Ravelobe	-16.3091	46.8241	female	paired-end	5080140	4156428	3385602	72018	11.8079	1851	468	M. ravelobensis			PRJNA560399	4
Microcebus ravelobensis	Mrav_m130y17_anko	Ankomakoma	-16.3486	46.7334	male	paired-end	7593208	6352018	5052267	77701	16.339	1853	468	M. ravelobensis			PRJNA560399	4
Microcebus ravelobensis	Mrav_m58y12_ampi_S12	Ampijoroa	-16.322	46.7934	male	single-end	4336046	3503972	2805894	59792	22.4097	1079	468	M. ravelobensis			PRJNA807164	SE 543
Microcebus ravelobensis	Mrav_f330y18_mari	Mariarano	-15.3779	46.7519	female	paired-end	10418214	9814644	6438173	80227	20.1774	1816	469	M. ravelobensis			PRJNA807164	22
Microcebus ravelobensis	Mrav_f110y17_mari	Mariarano	-15.4799	46.6381	female	paired-end	11432624	10678130	7112637	82125	21.7537	1849	470	M. ravelobensis			PRJNA807164	21
Microcebus ravelobensis	Mrav_m67y17_rav	Ravelobe	-16.3009	46.8215	male	paired-end	7668306	6525174	5161473	76206	17.0129	1873	472	M. ravelobensis			PRJNA560399	4
Microcebus ravelobensis	Mrav_f138y18_mari	Mariarano	-15.5096	46.7259	female	paired-end	9640042	9100040	5932928	79271	18.8413	1882	472	M. ravelobensis			PRJNA807164	22
Microcebus ravelobensis	Mrav_29y04_rano	Andoharano	-16.2882	47.0027	male	paired-end	8747776	8126898	5322581	76800	17.4129	1919	473	M. ravelobensis			PRJNA807164	21
Microcebus ravelobensis	Mrav_m29y17_rav	Ravelobe	-16.3021	46.8162	male	paired-end	5281620	4406098	3500130	75675	11.6132	1881	478	M. ravelobensis			PRJNA560399	4
Microcebus ravelobensis	Mrav_f97y17_koma	Ankomakoma	-16.3362	46.738	female	paired-end	8224856	7626406	4930787	76980	16.0955	1916	479	M. ravelobensis			PRJNA807164	21
Microcebus ravelobensis	Mrav_f17y17_mari	Mariarano	-15.4949	46.6969	female	paired-end	11677630	10982348	6957644	81886	21.3695	2011	484	M. ravelobensis			PRJNA807164	22
Microcebus ravelobensis	Mrav_f134y17_jabe	Ambanjabe	-16.3287	46.7159	female	paired-end	7374470	6799924	4334873	76469	14.2426	1926	490	M. ravelobensis			PRJNA807164	21
Microcebus ravelobensis	Mrav_m139y17_jabe	Ambanjabe	-16.3011	46.7154	male	paired-end	9087646	8382554	5417747	78630	17.3234	1938	491	M. ravelobensis			PRJNA807164	21
Microcebus ravelobensis	Mrav_m48y17_rav	Ravelobe	-16.3146	46.8226	male	paired-end	5729448	4577420	3286128	71537	11.5143	1908	494	M. ravelobensis			PRJNA560399	4
Microcebus ravelobensis	Mrav_m361y18_jabe	Ambanjabe	-16.2831	46.6992	male	paired-end	8275464	7647886	4981773	76656	16.3229	1987	496	M. ravelobensis			PRJNA807164	21
Microcebus ravelobensis	Mrav_m104y12_ampi_S12	Ampijoroa	-16.3082	46.7928	male	single-end	6201812	4809429	3800439	64571	28.09	1499	497	M. ravelobensis			PRJNA807164	SE 543
Microcebus ravelobensis	Mrav_f135y17_jabe	Ambanjabe	-16.3039	46.7101	female	paired-end	6283090	5814596	3740544	75248	12.5065	2020	502	M. ravelobensis			PRJNA807164	21
Microcebus ravelobensis	Mrav_f28y12_ampi_S12	Ampijoroa	-16.3246	46.7921	female	single-end	5922556	4512523	3792235	63806	28.2874	1001	502	M. ravelobensis			PRJNA807164	SE 543
Microcebus ravelobensis	Mrav_m32y17_rav	Ravelobe	-16.2967	46.8143	male	paired-end	8752026	8078850	5248243	77019	17.1301	2043	505	M. ravelobensis			PRJNA807164	21
Microcebus ravelobensis	Mrav_m63y12_ampi_S12	Ampijoroa	-16.3205	46.8049	male	single-end	9521684	7569767	6203267	65139	45.7837	1138	505	M. ravelobensis			PRJNA807164	SE 543
Microcebus ravelobensis	Mrav_m81y17_rav	Ravelobe	-16.3121	46.8219	male	paired-end	8227234	6811486	5494885	77010	17.9146	2000	509	M. ravelobensis			PRJNA560399	4
Microcebus ravelobensis	Mrav_f82y17_rav	Ravelobe	-16.3102	46.8212	female	paired-end	9305280	7881988	6141724	77528	19.893	2037	512	M. ravelobensis		×	PRJNA560399	4
Microcebus ravelobensis	Mrav_30y04_rano	Andoharano	-16.2868	47.0033	male	paired-end	12716194	11787628	7599216	80979	23.5667	2076	521	M. ravelobensis		×	PRJNA807164	21
Microcebus ravelobensis	Mrav_m120y17_anko	Ankomakoma	-16.3443	46.7379	male	paired-end	8788492	7357864	5877696	79511	18.5843	2043	522	M. ravelobensis			PRJNA560399	4
Microcebus ravelobensis	Mrav_m97y12_ampi_S12	Ampijoroa	-16.3209	46.7999	male	single-end	9618380	5306531	4129766	62894	27.4733	1444	524	M. ravelobensis			PRJNA807164	SE 543
Microcebus ravelobensis	Mrav_f216y14_mari_S12	Mariarano	-15.5087	46.7167	female	single-end	1997416	1552064	1067156	46648	11.0021	1214	536	M. ravelobensis			PRJNA807164	SE 543
Microcebus ravelobensis	Mrav_m58y17_rav	Ravelobe	-16.3087	46.8242	male	paired-end	8061824	6721146	5368286	78248	17.2344	2103	540	M. ravelobensis			PRJNA560399	4
Microcebus ravelobensis	Mrav_f77y17_rav	Ravelobe	-16.3135	46.8218	female	paired-end	5916048	4908846	2748753	71131	9.70384	2144	555	M. ravelobensis			PRJNA560399	4
Microcebus ravelobensis	Mrav_m23y14_ampi_S12	Ampijoroa	-16.3201	46.8064	male	single-end	4214078	4153331	3170769	63875	24.6862	1515	580	M. ravelobensis			PRJNA807164	SE 542
Microcebus ravelobensis	Mrav_m73y12_ampi_S12	Ampijoroa	-16.3207	46.7942	male	single-end	6983981	5438780	4551691	65464	33.5012	1770	630	M. ravelobensis			PRJNA807164	SE 543
Microcebus ravelobensis	Mrav_f71y12_ampi_S12	Ampijoroa	-16.3192	46.8	female	single-end	5448772	4318138	3241204	61053	24.2904	1471	646	M. ravelobensis			PRJNA807164	SE 543
Microcebus ravelobensis	Mrav_f231y14_mari_S12	Mariarano	-15.4722	46.705	female	single-end	3195927	2474324	1372414	52563	12.5708	1957	677	M. ravelobensis			PRJNA807164	SE 543
Microcebus ravelobensis	Mrav_f56y12_ampi_S12	Ampijoroa	-16.3211	46.794	female	single-end	8608536	6591020	5406796	67683	38.2761	1563	684	M. ravelobensis			PRJNA807164	SE 543
Microcebus ravelobensis	Mrav_f02y11_ampi_S12	Ampijoroa	-16.3211	46.8062	female	single-end	3307650	3262609	1934570	59708	16.0677	1907	702	M. ravelobensis			PRJNA807164	SE 542
Microcebus ravelobensis	Mrav_m217y14_mari_S12	Mariarano	-15.5085	46.7163	male	single-end	3346344	2731083	2130634	58753	17.527	2118	704	M. ravelobensis			PRJNA807164	SE 543
Microcebus ravelobensis	Mrav_m79y12_ampi_S12	Ampijoroa	-16.3215	46.7998	male	single-end	8418821	6660089	5559771	65849	40.341	2682	713	M. ravelobensis			PRJNA807164	SE 543
Microcebus ravelobensis	Mrav_m25y13_ampi_S12	Ampijoroa	-16.3182	46.8091	male	single-end	4717961	4639437	3429936	65586	26.0236	2069	717	M. ravelobensis			PRJNA807164	SE 542
Microcebus ravelobensis	Mrav_13y03_anko_S12	Ankoririka	-16.2677	47.0512	male	single-end	3801889	3746148	2776652	62919	21.9378	3826	818	M. ravelobensis			PRJNA807164	SE 542
Microcebus ravelobensis	Mrav_m63y11_ampi_S12	Ampijoroa	-16.3191	46.7942	male	single-end	3594967	3537264	2411499	63093	18.9296	2129	834	M. ravelobensis			PRJNA807164	SE 542
Microcebus ravelobensis	Mrav_f95y12_ampi_S12	Ampijoroa	-16.3221	46.7996	female	single-end	6312888	5122544	3933265	64178	29.3416	2114	854	M. ravelobensis			PRJNA807164	SE 543
Microcebus ravelobensis	Mrav_m178y14_mari_S12	Mariarano	-15.4671	46.6947	male	single-end	7156327	5754511	4627652	64251	34.7184	1915	871	M. ravelobensis			PRJNA807164	SE 543
Microcebus ravelobensis	Mrav_10y03_anko_S12	Ankoririka	-16.2673	47.0505	male	single-end	4265307	4205931	3130367	64495	24.0512	3681	878	M. ravelobensis			PRJNA807164	SE 542
Microcebus ravelobensis	Mrav_10y13_jbb_S12	Ampijoroa	-16.2998	46.8116	male	single-end	4097154	4041604	2796292	62438	22.2664	2753	894	M. ravelobensis			PRJNA807164	SE 542
Microcebus ravelobensis	Mrav_f91y12_ampi_S12	Ampijoroa	-16.3207	46.7942	female	single-end	4461397	3335312	2765151	60503	21.8209	2086	909	M. ravelobensis			PRJNA807164	SE 543
Microcebus ravelobensis	Mrav_m68y11_ampi_S12	Ampijoroa	-16.3181	46.8065	male	single-end	4474267	4405551	2402621	63346	18.7986	2463	921	M. ravelobensis			PRJNA807164	SE 542
Microcebus ravelobensis	Mrav_f119y14_mari_S12	Mariarano	-15.4933	46.702	female	single-end	5742605	4106553	3384237	59930	27.2225	2104	951	M. ravelobensis			PRJNA807164	SE 543
Microcebus ravelobensis	Mrav_m108y12_ampi_S12	Ampijoroa	-16.324	46.7924	male	single-end	4736141	3731773	3102810	61239	23.6837	2635	1007	M. ravelobensis			PRJNA807164	SE 543
Microcebus ravelobensis	Mrav_m35y12_ampi_S12	Ampijoroa	-16.3213	46.7934	male	single-end	5698058	4594129	3723817	63724	28.0272	2859	1036	M. ravelobensis			PRJNA807164	SE 543
Microcebus ravelobensis	Mrav_m66y12_ampi_S12	Ampijoroa	-16.3036	46.7922	male	single-end	4645433	3497921	2966650	60012	23.5303	2298	1041	M. ravelobensis			PRJNA807164	SE 543
Microcebus ravelobensis	Mrav_f37y11_ampi_S12	Ampijoroa	-16.319	46.806	female	single-end	3599489	3545987	2455691	62352	19.5631	2967	1060	M. ravelobensis			PRJNA807164	SE 542
Microcebus ravelobensis	Mrav_m65y13_mari_S12	Mariarano	-15.4721	46.7083	male	single-end	5523071	4514633	3652718	63112	27.8887	2859	1110	M. ravelobensis			PRJNA807164	SE 543
Microcebus ravelobensis	Mrav_f68y13_mari_S12	Mariarano	-15.4701	46.71	female	single-end	4083653	3149267	2468135	56057	20.9772	2535	1120	M. ravelobensis			PRJNA807164	SE 543
Microcebus ravelobensis	Mrav_m5y14_ampi_S12	Ampijoroa	-16.3211	46.8062	male	single-end	4530825	4465084	3012940	64778	23.1754	2787	1173	M. ravelobensis			PRJNA807164	SE 542
Microcebus ravelobensis	Mrav_m55y11_ampi_S12	Ampijoroa	-16.3185	46.8071	male	single-end	4497671	4434849	2894723	64011	22.4205	2546	1175	M. ravelobensis	×		PRJNA807164	SE 542
Microcebus ravelobensis	Mrav_f143y14_mari_S12	Mariarano	-15.4711	46.6964	female	single-end	5983439	4850890	3813157	62567	29.2592	2630	1217	M. ravelobensis			PRJNA807164	SE 543
Microcebus ravelobensis	Mrav_f121y14_mari_S12	Mariarano	-15.4935	46.705	female	single-end	5909941	4700237	3795996	61239	29.7809	2710	1281	M. ravelobensis			PRJNA807164	SE 543
Microcebus ravelobensis	Mrav_f62y13_mari_S12	Mariarano	-15.4678	46.7065	female	single-end	6004962	4696644	3751624	62388	28.9136	2655	1292	M. ravelobensis			PRJNA807164	SE 543
Microcebus ravelobensis	Mrav_m6y11_ampi_S12	Ampijoroa	-16.323	46.8061	male	single-end	4770681	4703008	3647697	66268	27.3833	3439	1314	M. ravelobensis			PRJNA807164	SE 542
Microcebus ravelobensis	Mrav_m127y14_mari_S12	Mariarano	-15.4934	46.7025	male	single-end	5911272	4637310	3766722	61434	29.2468	3204	1348	M. ravelobensis			PRJNA807164	SE 543
Microcebus ravelobensis	Mrav_f132y14_mari_S12	Mariarano	-15.472	46.6951	female	single-end	5277089	4165878	3073466	61626	23.1545	3420	1415	M. ravelobensis			PRJNA807164	SE 543
Microcebus ravelobensis	Mrav_f30y13_ampi_S12	Ampijoroa	-16.3202	46.806	female	single-end	5767480	5679582	4245786	67191	31.5365	3373	1425	M. ravelobensis			PRJNA807164	SE 542
Microcebus ravelobensis	Mrav_f34y12_ampi_S12	Ampijoroa	-16.3211	46.7937	female	single-end	7948431	6087394	5134993	65230	37.8629	3346	1442	M. ravelobensis			PRJNA807164	SE 543
Microcebus ravelobensis	Mrav_f134y14_mari_S12	Mariarano	-15.4718	46.6956	female	single-end	5909375	4704365	3782661	63029	28.4133	3242	1449	M. ravelobensis			PRJNA807164	SE 543
Microcebus ravelobensis	Mrav_f227y14_mari_S12	Mariarano	-15.4711	46.7025	female	single-end	5785338	4731008	3339359	61906	25.9063	3573	1490	M. ravelobensis			PRJNA807164	SE 543
Microcebus ravelobensis	Mrav_m125y14_mari_S12	Mariarano	-15.4929	46.7011	male	single-end	6538248	4892609	4201280	62011	32.3357	3193	1496	M. ravelobensis			PRJNA807164	SE 543
Microcebus ravelobensis	Mrav_f61y13_mari_S12	Mariarano	-15.4678	46.7063	female	single-end	5287693	4268998	3407975	62011	26.1187	3170	1514	M. ravelobensis			PRJNA807164	SE 543
Microcebus ravelobensis	Mrav_m93y12_ampi_S12	Ampijoroa	-16.3238	46.7998	male	single-end	8373823	6547807	5573011	66022	40.6723	3697	1547	M. ravelobensis			PRJNA807164	SE 543
Microcebus ravelobensis	Mrav_f66y13_mari_S12	Mariarano	-15.471	46.7091	female	single-end	5917220	4497424	3639328	63121	27.7237	3813	1608	M. ravelobensis			PRJNA807164	SE 543
Microcebus ravelobensis	Mrav_m39y13_mari_S12	Mariarano	-15.4695	46.7096	male	single-end	5341877	4161353	3246276	61800	25.2446	4204	1686	M. ravelobensis			PRJNA807164	SE 543
Microcebus ravelobensis	Mrav_f41y13_mari_S12	Mariarano	-15.4707	46.7095	female	single-end	4580743	3631892	2870285	59838	23.0774	3957	1713	M. ravelobensis			PRJNA807164	SE 543
Microcebus ravelobensis	Mrav_f33y13_ampi_S12	Ampijoroa	-16.3218	46.8069	female	single-end	5875259	5782007	4361172	64392	33.5854	5533	1849	M. ravelobensis			PRJNA807164	SE 542
Microcebus ravelobensis	Mrav_f63y14_mari_S12	Mariarano	-15.4653	46.6935	female	single-end	6234174	5119430	4061200	64054	30.551	4281	1965	M. ravelobensis			PRJNA807164	SE 543
Microcebus ravelobensis	Mrav_m130y13_mari_S12	Mariarano	-15.4948	46.6984	male	single-end	5044039	4007375	3111305	62305	23.5948	5654	2073	M. ravelobensis			PRJNA807164	SE 543
Microcebus ravelobensis	Mrav_m45y13_ampi_S12	Ampijoroa	-16.3188	46.8083	male	single-end	4393397	4320382	3185874	65511	24.186	4918	2198	M. ravelobensis			PRJNA807164	SE 542
Microcebus ravelobensis	Mrav_m4y13_ampi_S12	Ampijoroa	-16.3188	46.8066	male	single-end	7784328	7658836	6051403	68893	43.802	7799	2793	M. ravelobensis			PRJNA807164	SE 542
Microcebus ravelobensis	Mrav_m2y14_ampi_S12	Ampijoroa	-16.3214	46.8064	male	single-end	7853660	7727203	5907644	69342	42.3695	7260	3003	M. ravelobensis			PRJNA807164	SE 542
Microcebus ravelobensis	Mrav_f24y14_ampi_S12	Ampijoroa	-16.3224	46.8052	female	single-end	16259389	16012191	13181071	73357	89.6633	17171	7253	M. ravelobensis			PRJNA807164	SE 542
Microcebus ravelobensis	Mrav_m20y14_ampi_S12	Ampijoroa	-16.3222	46.798	male	single-end	45907741	37021768	32134437	79796	193.953	41505	20383	M. ravelobensis			PRJNA807164	SE 543
Mirza zaza	Mirzazaz_DLC2304m	Duke Lemur Center	NA	NA	male	paired-end	1894349	1711329	1139315	60324	4.72006	NA	NA	NA			PRJNA807164		used as outgroup for estimation of Patterson's D
Mirza zaza	Mirzazaz_DLC2316m	Duke Lemur Center	NA	NA	male	paired-end	2803540	2453868	1738510	64221	6.75438	NA	NA	NA			PRJNA807164		used as outgroup for estimation of Patterson's D
Mirza zaza	Mirzazaz_DLC319m	Duke Lemur Center	NA	NA	male	paired-end	5715596	5221885	2807225	68571	10.227	NA	NA	NA			PRJNA807164		used as outgroup for estimation of Patterson's D
Mirza zaza	Mirzazaz_DLC323f	Duke Lemur Center	NA	NA	female	paired-end	3184511	2915180	1606349	65237	6.14857	NA	NA	NA			PRJNA807164		used as outgroup for estimation of Patterson's D
